# Supplementary material
Source: Research Square preprint supplement (doi:10.21203/rs.3.rs-9051174/v1)
Supplement: Supplementary file 1 [file 992d800bb40d195d95e2fc41.docx]

Supplementary Full Uncropped Blots

**General notes**

All Western blot signals were detected by X-ray film exposure.

Membranes were cut prior to antibody incubation as described in individual supplementary figure legends.

**Supplementary Figure S1**

Full uncropped film images corresponding to **Figure 1A**

After protein transfer, membranes were cut according to molecular weight and probed separately with different primary antibodies. Each membrane piece was independently exposed to X-ray film. The images shown here represent full, uncropped scans of the original films corresponding to the blots presented in **Figure 1**. Red boxes indicate the regions used in the main figure.


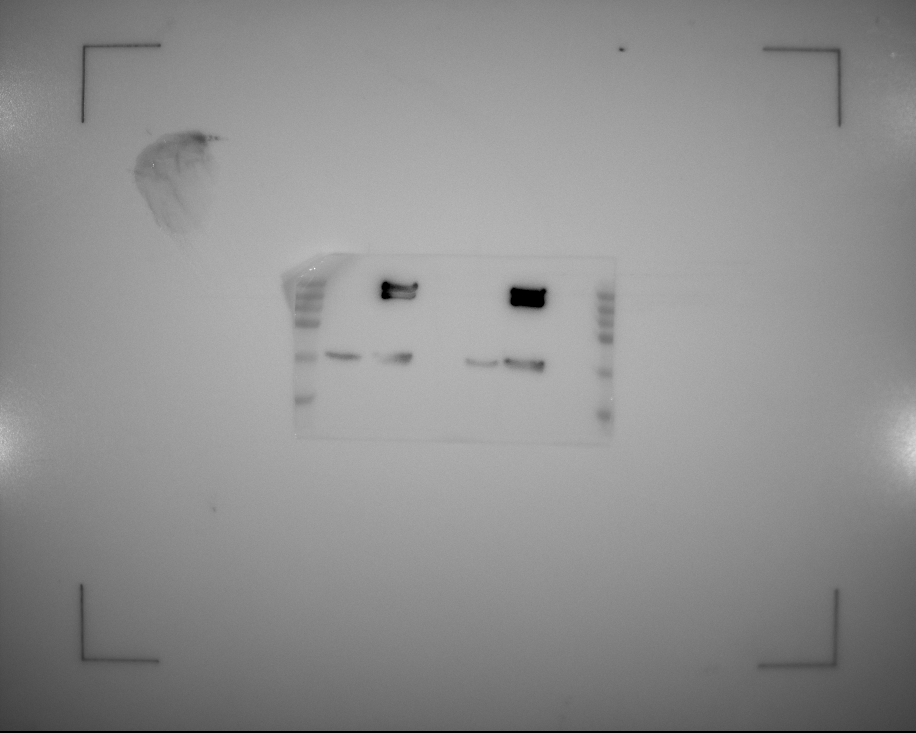


CD9


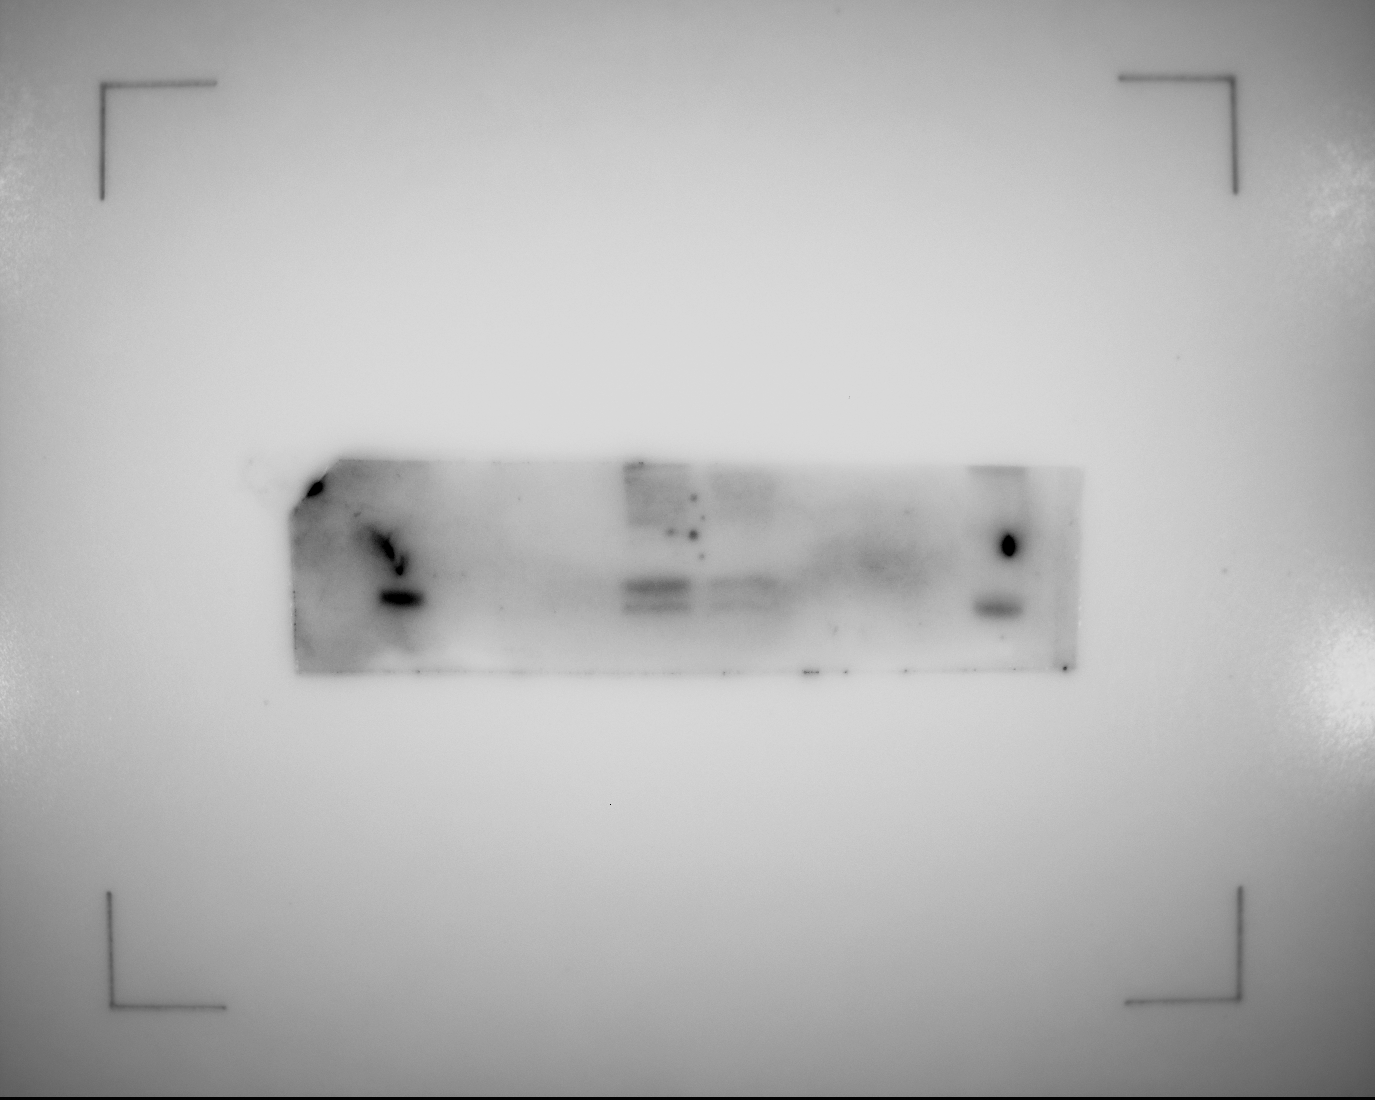


CD63


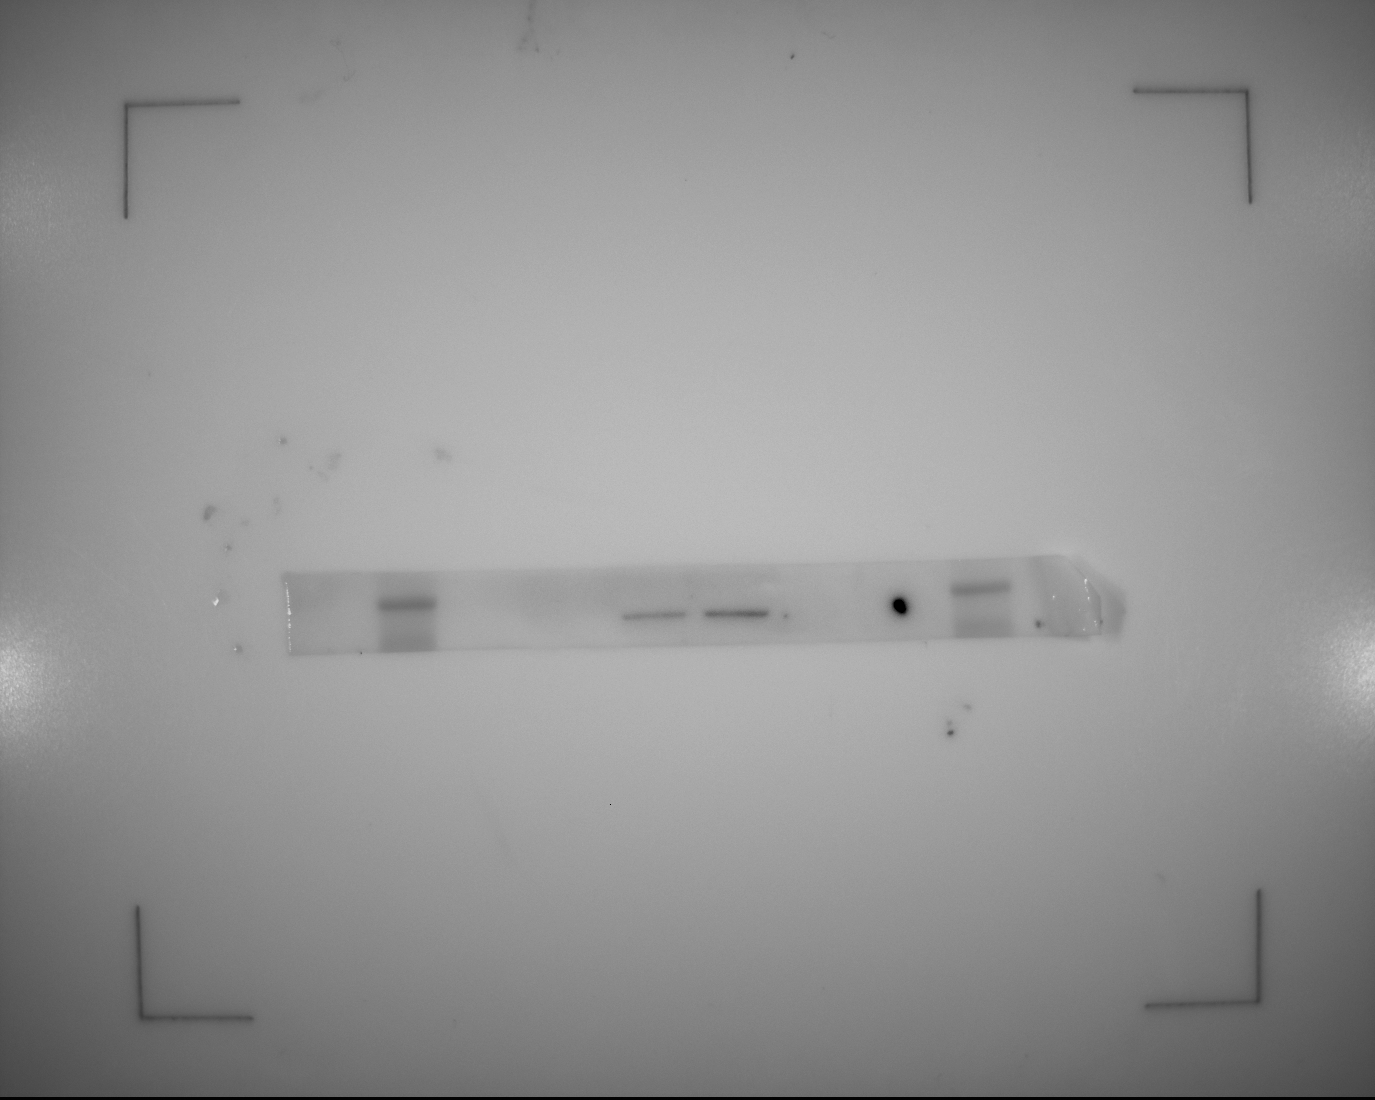

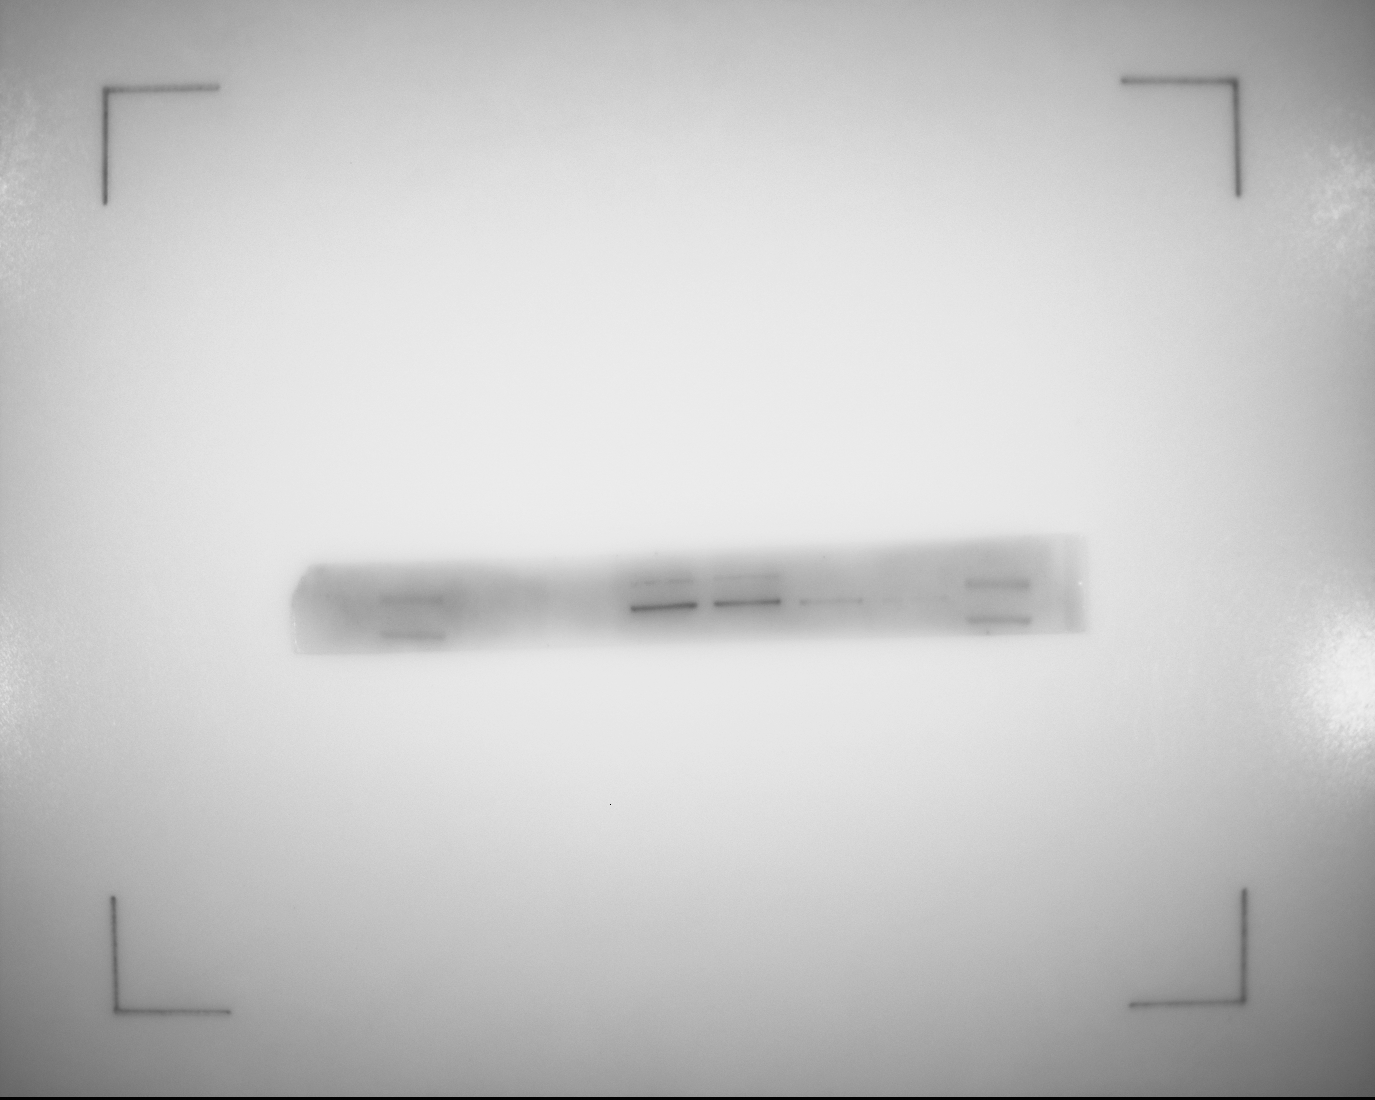


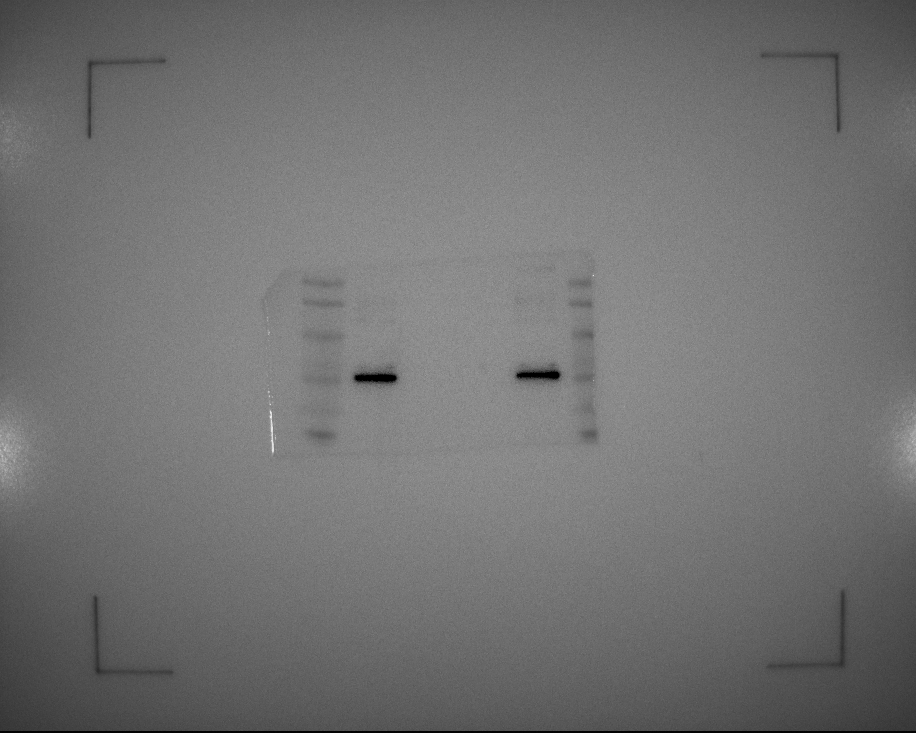


Calnexin

TSG101

GM130

**Supplementary Figure S2**

Full uncropped film images corresponding to **Figure 5B**

After protein transfer, membranes were cut according to molecular weight and probed separately with different primary antibodies. Each membrane piece was independently exposed to X-ray film. The images shown here represent full, uncropped scans of the original films corresponding to the blots presented in **Figure 5**. Red boxes indicate the regions used in the main figure.


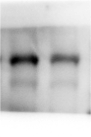


IκBα


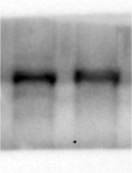


**Supplementary Figure S2**

Full uncropped film images corresponding to **Figure 5C**

After protein transfer, membranes were cut according to molecular weight and probed separately with different primary antibodies. Each membrane piece was independently exposed to X-ray film. The images shown here represent full, uncropped scans of the original films corresponding to the blots presented in **Figure 5**. Red boxes indicate the regions used in the main figure.


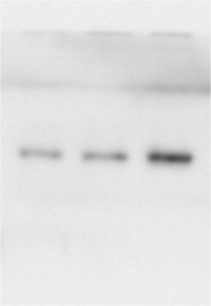


IκBα


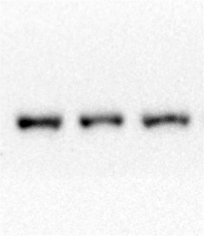


β-Actin

β-Actin
