# Supplementary material
Source: Research Square preprint supplement (doi:10.21203/rs.3.rs-9051174/v1)
Supplement: Supplementary file 2 [file ce5c4d43b78584a3fce5578b.xlsx]

## Sheet: Sheet1
MiRNA	Target	MiRNA Change
hsa-let-7a-3p	HAUS6	Upregulated
hsa-let-7a-3p	ZNF451	Upregulated
hsa-let-7a-5p	IFT80	Upregulated
hsa-let-7a-5p	CADM2	Upregulated
hsa-let-7a-5p	ENOSF1	Upregulated
hsa-let-7a-5p	SERPINB9	Upregulated
hsa-let-7a-5p	AXL	Upregulated
hsa-let-7a-5p	GLIPR2	Upregulated
hsa-let-7a-5p	ZNF473	Upregulated
hsa-let-7a-5p	TP53INP2	Upregulated
hsa-let-7a-5p	E2F2	Upregulated
hsa-let-7a-5p	TSEN34	Upregulated
hsa-let-7a-5p	ZCCHC3	Upregulated
hsa-let-7a-5p	HELQ	Upregulated
hsa-let-7a-5p	HSPA14	Upregulated
hsa-let-7a-5p	ANGPT4	Upregulated
hsa-let-7a-5p	URGCP-MRPS24	Upregulated
hsa-let-7a-5p	UTRN	Upregulated
hsa-let-7a-5p	IDS	Upregulated
hsa-let-7a-5p	FBXW2	Upregulated
hsa-let-7a-5p	CCDC93	Upregulated
hsa-let-7a-5p	KPNA6	Upregulated
hsa-let-7b-3p	ARIH1	Upregulated
hsa-let-7c-5p	CACNB4	Upregulated
hsa-let-7c-5p	MAPK4	Upregulated
hsa-let-7c-5p	ASPH	Upregulated
hsa-let-7c-5p	SNRPD3	Upregulated
hsa-let-7c-5p	LRRC6	Upregulated
hsa-let-7c-5p	MAP4K3	Upregulated
hsa-let-7c-5p	CPEB2	Upregulated
hsa-let-7c-5p	CDC42SE2	Upregulated
hsa-let-7c-5p	KPNA6	Upregulated
hsa-let-7c-5p	ZC3H6	Upregulated
hsa-let-7c-5p	ZNF391	Upregulated
hsa-let-7c-5p	SZT2	Upregulated
hsa-let-7c-5p	TSEN34	Upregulated
hsa-let-7c-5p	PDLIM7	Upregulated
hsa-let-7c-5p	TMOD2	Upregulated
hsa-let-7c-5p	TAOK1	Upregulated
hsa-let-7c-5p	NIPA1	Upregulated
hsa-let-7c-5p	GAB2	Upregulated
hsa-let-7c-5p	SLC35B4	Upregulated
hsa-let-7c-5p	KIAA1462	Upregulated
hsa-let-7c-5p	TP53INP2	Upregulated
hsa-let-7c-5p	SLC5A1	Upregulated
hsa-let-7c-5p	MIDN	Upregulated
hsa-let-7c-5p	DNAJA2	Upregulated
hsa-let-7c-5p	EGR3	Upregulated
hsa-let-7c-5p	EEF2K	Upregulated
hsa-let-7c-5p	FOSL1	Upregulated
hsa-let-7c-5p	ENAH	Upregulated
hsa-let-7c-5p	SOX13	Upregulated
hsa-let-7c-5p	XK	Upregulated
hsa-let-7c-5p	SLC35F2	Upregulated
hsa-let-7c-5p	DERL2	Upregulated
hsa-let-7c-5p	FAM134C	Upregulated
hsa-let-7c-5p	PSKH1	Upregulated
hsa-let-7c-5p	ABCG4	Upregulated
hsa-let-7c-5p	ADAMTS4	Upregulated
hsa-let-7c-5p	ATP2B2	Upregulated
hsa-let-7c-5p	ELK1	Upregulated
hsa-let-7c-5p	ZNF362	Upregulated
hsa-let-7d-3p	NARS	Upregulated
hsa-let-7f-5p	CADM2	Upregulated
hsa-let-7f-5p	NRG1	Upregulated
hsa-let-7f-5p	TSEN34	Upregulated
hsa-let-7f-5p	ZCCHC3	Upregulated
hsa-let-7f-5p	DYRK1A	Upregulated
hsa-let-7f-5p	IDS	Upregulated
hsa-let-7f-5p	TP53INP2	Upregulated
hsa-let-7f-5p	SERPINB9	Upregulated
hsa-let-7f-5p	ANGPT4	Upregulated
hsa-let-7f-5p	CCDC93	Upregulated
hsa-let-7f-5p	FBXW2	Upregulated
hsa-let-7f-5p	MRI1	Upregulated
hsa-let-7g-5p	GNG5	Upregulated
hsa-let-7g-5p	ZNF473	Upregulated
hsa-let-7g-5p	IDS	Upregulated
hsa-let-7g-5p	PSMF1	Upregulated
hsa-let-7g-5p	RPL13	Upregulated
hsa-let-7g-5p	ZCCHC3	Upregulated
hsa-let-7g-5p	IFT80	Upregulated
hsa-let-7g-5p	CADM2	Upregulated
hsa-let-7g-5p	PARD6B	Upregulated
hsa-let-7g-5p	TSEN34	Upregulated
hsa-let-7g-5p	FBXW2	Upregulated
hsa-let-7g-5p	URGCP-MRPS24	Upregulated
hsa-let-7g-5p	CCDC93	Upregulated
hsa-let-7g-5p	MRI1	Upregulated
hsa-let-7g-5p	SERPINB9	Upregulated
hsa-miR-101-3p	HEG1	Upregulated
hsa-miR-101-3p	DNAL1	Upregulated
hsa-miR-101-3p	HHIP	Upregulated
hsa-miR-101-3p	NRAS	Upregulated
hsa-miR-10a-5p	RAP2A	Upregulated
hsa-miR-10a-5p	CADM2	Upregulated
hsa-miR-10a-5p	LSAMP	Upregulated
hsa-miR-10b-3p	TP53INP2	Upregulated
hsa-miR-10b-3p	TANC1	Upregulated
hsa-miR-10b-3p	MTMR7	Upregulated
hsa-miR-10b-3p	PUS1	Upregulated
hsa-miR-10b-3p	THUMPD1	Upregulated
hsa-miR-10b-3p	CHAF1A	Upregulated
hsa-miR-10b-3p	SHROOM4	Upregulated
hsa-miR-10b-5p	CADM2	Upregulated
hsa-miR-1185-1-3p	HNRNPH3	Upregulated
hsa-miR-1185-1-3p	CHP1	Upregulated
hsa-miR-1185-1-3p	SOGA3	Upregulated
hsa-miR-1185-1-3p	NR3C1	Upregulated
hsa-miR-1185-1-3p	RBM12	Upregulated
hsa-miR-1185-1-3p	LDLRAD3	Upregulated
hsa-miR-1185-1-3p	TCF4	Upregulated
hsa-miR-1185-1-3p	SRGAP2	Upregulated
hsa-miR-1185-1-3p	ZNF451	Upregulated
hsa-miR-1185-1-3p	ST8SIA3	Upregulated
hsa-miR-1185-1-3p	CSMD2	Upregulated
hsa-miR-1185-1-3p	AFAP1	Upregulated
hsa-miR-1185-1-3p	ZNF391	Upregulated
hsa-miR-1185-1-3p	ASPH	Upregulated
hsa-miR-1185-1-3p	INPP5B	Upregulated
hsa-miR-1185-1-3p	RAPGEF1	Upregulated
hsa-miR-1185-1-3p	SAMD4A	Upregulated
hsa-miR-1185-1-3p	PTPN6	Upregulated
hsa-miR-1185-1-3p	NIN	Upregulated
hsa-miR-1185-1-3p	ZC3H6	Upregulated
hsa-miR-1185-1-3p	ATXN7L3	Upregulated
hsa-miR-1185-1-3p	LRPPRC	Upregulated
hsa-miR-1185-1-3p	SLTM	Upregulated
hsa-miR-1185-1-3p	PHLDA1	Upregulated
hsa-miR-1185-2-3p	PHLDA1	Upregulated
hsa-miR-1185-2-3p	SRGAP2	Upregulated
hsa-miR-1185-2-3p	TCF4	Upregulated
hsa-miR-1185-2-3p	SLTM	Upregulated
hsa-miR-1185-2-3p	ZCCHC2	Upregulated
hsa-miR-1185-2-3p	ATXN3	Upregulated
hsa-miR-1185-2-3p	ASPH	Upregulated
hsa-miR-1185-2-3p	ATXN7L3	Upregulated
hsa-miR-1185-2-3p	AFAP1	Upregulated
hsa-miR-1185-2-3p	PDE2A	Upregulated
hsa-miR-1185-2-3p	NR3C1	Upregulated
hsa-miR-1185-2-3p	LRPPRC	Upregulated
hsa-miR-1185-2-3p	RAPGEF1	Upregulated
hsa-miR-1185-2-3p	HNRNPH3	Upregulated
hsa-miR-1185-2-3p	PTPN3	Upregulated
hsa-miR-1185-2-3p	CHP1	Upregulated
hsa-miR-1185-2-3p	PTPN6	Upregulated
hsa-miR-1185-2-3p	MAPK4	Upregulated
hsa-miR-1185-2-3p	LDLRAD3	Upregulated
hsa-miR-1185-2-3p	NIN	Upregulated
hsa-miR-1185-2-3p	SAMD4A	Upregulated
hsa-miR-1185-2-3p	ZNF391	Upregulated
hsa-miR-1185-2-3p	RBM12	Upregulated
hsa-miR-1185-2-3p	SOGA3	Upregulated
hsa-miR-1185-2-3p	INPP5B	Upregulated
hsa-miR-1185-2-3p	CSMD2	Upregulated
hsa-miR-1185-2-3p	MTMR9	Upregulated
hsa-miR-1185-2-3p	ELMSAN1	Upregulated
hsa-miR-1185-2-3p	ZNF451	Upregulated
hsa-miR-1185-2-3p	ZC3H6	Upregulated
hsa-miR-1185-2-3p	ST8SIA3	Upregulated
hsa-miR-128-3p	SSR3	Upregulated
hsa-miR-128-3p	ZNF287	Upregulated
hsa-miR-128-3p	GAB2	Upregulated
hsa-miR-128-3p	HFE	Upregulated
hsa-miR-128-3p	SBF1	Upregulated
hsa-miR-128-3p	SSBP2	Upregulated
hsa-miR-128-3p	PTPN3	Upregulated
hsa-miR-128-3p	FAM134C	Upregulated
hsa-miR-128-3p	MNT	Upregulated
hsa-miR-128-3p	DGKH	Upregulated
hsa-miR-128-3p	EYA3	Upregulated
hsa-miR-128-3p	BMI1	Upregulated
hsa-miR-128-3p	TMOD2	Upregulated
hsa-miR-128-3p	LMX1B	Upregulated
hsa-miR-128-3p	KLHL5	Upregulated
hsa-miR-128-3p	SRGAP2	Upregulated
hsa-miR-128-3p	ADGRA1	Upregulated
hsa-miR-128-3p	YAF2	Upregulated
hsa-miR-128-3p	JRK	Upregulated
hsa-miR-128-3p	COMMD3-BMI1	Upregulated
hsa-miR-128-3p	HLA-B	Upregulated
hsa-miR-1285-3p	LMX1B	Upregulated
hsa-miR-1285-3p	USP28	Upregulated
hsa-miR-1285-3p	AJUBA	Upregulated
hsa-miR-1285-3p	MRI1	Upregulated
hsa-miR-1285-3p	RGS5	Upregulated
hsa-miR-1285-3p	TPM3	Upregulated
hsa-miR-1285-3p	HMG20A	Upregulated
hsa-miR-1285-3p	ZSWIM7	Upregulated
hsa-miR-1285-3p	ENOSF1	Upregulated
hsa-miR-1285-3p	EHD2	Upregulated
hsa-miR-1285-3p	DNAL1	Upregulated
hsa-miR-1285-3p	ME2	Upregulated
hsa-miR-1285-3p	VPS13B	Upregulated
hsa-miR-1285-3p	PUS1	Upregulated
hsa-miR-1285-3p	ATG4B	Upregulated
hsa-miR-1285-3p	SHCBP1	Upregulated
hsa-miR-1285-3p	CCPG1	Upregulated
hsa-miR-1285-3p	COL5A1	Upregulated
hsa-miR-1285-3p	PACS2	Upregulated
hsa-miR-1285-3p	ETF1	Upregulated
hsa-miR-1285-3p	PECAM1	Upregulated
hsa-miR-1285-3p	TNFRSF10B	Upregulated
hsa-miR-1285-3p	PDHA1	Upregulated
hsa-miR-1285-3p	ATP6V1A	Upregulated
hsa-miR-1285-3p	PSMD6	Upregulated
hsa-miR-1285-3p	TTL	Upregulated
hsa-miR-1285-3p	DFFB	Upregulated
hsa-miR-1285-3p	SH3BP2	Upregulated
hsa-miR-1285-3p	LRRC27	Upregulated
hsa-miR-1285-3p	TBCD	Upregulated
hsa-miR-1285-3p	EPB41L1	Upregulated
hsa-miR-1285-3p	PTPRT	Upregulated
hsa-miR-1285-3p	AKAP13	Upregulated
hsa-miR-1285-3p	INTS2	Upregulated
hsa-miR-1285-3p	CDCA7L	Upregulated
hsa-miR-1285-3p	EGF	Upregulated
hsa-miR-1285-3p	CCL16	Upregulated
hsa-miR-1285-3p	E2F2	Upregulated
hsa-miR-1285-3p	PARD6B	Upregulated
hsa-miR-1285-3p	PSMF1	Upregulated
hsa-miR-1285-3p	SASH1	Upregulated
hsa-miR-1285-3p	TINAGL1	Upregulated
hsa-miR-1285-3p	CAPNS1	Upregulated
hsa-miR-1285-3p	PPIL2	Upregulated
hsa-miR-1285-3p	USP31	Upregulated
hsa-miR-1285-3p	HSPA14	Upregulated
hsa-miR-1285-3p	MOB1B	Upregulated
hsa-miR-1285-3p	ZMIZ2	Upregulated
hsa-miR-1285-3p	SURF6	Upregulated
hsa-miR-1285-3p	SLC35F2	Upregulated
hsa-miR-1285-3p	RELL1	Upregulated
hsa-miR-1285-3p	PAK2	Upregulated
hsa-miR-1285-3p	SNRPD3	Upregulated
hsa-miR-1285-3p	ELMSAN1	Upregulated
hsa-miR-1285-3p	NUDC	Upregulated
hsa-miR-1285-3p	MAPK1IP1L	Upregulated
hsa-miR-1285-3p	ARIH1	Upregulated
hsa-miR-1285-3p	SKA2	Upregulated
hsa-miR-1285-3p	PLXNA3	Upregulated
hsa-miR-1285-3p	SYDE2	Upregulated
hsa-miR-1285-3p	CCDC93	Upregulated
hsa-miR-1285-3p	USP9X	Upregulated
hsa-miR-1285-3p	ST13	Upregulated
hsa-miR-1285-3p	FBXW2	Upregulated
hsa-miR-1285-3p	PLXDC1	Upregulated
hsa-miR-1285-3p	CHP1	Upregulated
hsa-miR-1285-3p	AXL	Upregulated
hsa-miR-1285-3p	ZBTB44	Upregulated
hsa-miR-130b-5p	DIS3	Upregulated
hsa-miR-130b-5p	CLIC1	Upregulated
hsa-miR-130b-5p	NRG1	Upregulated
hsa-miR-130b-5p	CADM2	Upregulated
hsa-miR-130b-5p	FBXO21	Upregulated
hsa-miR-130b-5p	SPG20	Upregulated
hsa-miR-130b-5p	ELP3	Upregulated
hsa-miR-130b-5p	SLC37A4	Upregulated
hsa-miR-130b-5p	LMX1B	Upregulated
hsa-miR-130b-5p	ELMSAN1	Upregulated
hsa-miR-130b-5p	SURF6	Upregulated
hsa-miR-130b-5p	ABCB5	Upregulated
hsa-miR-130b-5p	ZBTB44	Upregulated
hsa-miR-130b-5p	SETD7	Upregulated
hsa-miR-130b-5p	NFAM1	Upregulated
hsa-miR-130b-5p	SYNPO	Upregulated
hsa-miR-130b-5p	INHBA	Upregulated
hsa-miR-130b-5p	KIAA1324L	Upregulated
hsa-miR-130b-5p	AJUBA	Upregulated
hsa-miR-130b-5p	ZNF496	Upregulated
hsa-miR-130b-5p	CCL16	Upregulated
hsa-miR-130b-5p	RCC1	Upregulated
hsa-miR-132-3p	SSBP2	Upregulated
hsa-miR-132-3p	TCF4	Upregulated
hsa-miR-132-3p	MRPL43	Upregulated
hsa-miR-132-3p	SFMBT1	Upregulated
hsa-miR-132-3p	STK16	Upregulated
hsa-miR-132-3p	SRGAP2	Upregulated
hsa-miR-132-3p	NRCAM	Upregulated
hsa-miR-132-3p	NET1	Upregulated
hsa-miR-132-3p	KIAA1211	Upregulated
hsa-miR-132-3p	IL1RL1	Upregulated
hsa-miR-132-3p	AIDA	Upregulated
hsa-miR-132-3p	CHP1	Upregulated
hsa-miR-132-3p	PIKFYVE	Upregulated
hsa-miR-132-3p	KIAA1549L	Upregulated
hsa-miR-132-3p	ST8SIA3	Upregulated
hsa-miR-132-3p	RRP15	Upregulated
hsa-miR-132-3p	ZNF678	Upregulated
hsa-miR-139-5p	TCF4	Upregulated
hsa-miR-139-5p	MCTP1	Upregulated
hsa-miR-139-5p	NFIB	Upregulated
hsa-miR-139-5p	RYR2	Upregulated
hsa-miR-139-5p	DPY19L3	Upregulated
hsa-miR-139-5p	CAPRIN2	Upregulated
hsa-miR-139-5p	ZNF391	Upregulated
hsa-miR-139-5p	ZNF451	Upregulated
hsa-miR-139-5p	TAOK1	Upregulated
hsa-miR-139-5p	NCR3LG1	Upregulated
hsa-miR-139-5p	NAA25	Upregulated
hsa-miR-139-5p	XK	Upregulated
hsa-miR-139-5p	MNT	Upregulated
hsa-miR-139-5p	TCF3	Upregulated
hsa-miR-139-5p	MYLK4	Upregulated
hsa-miR-139-5p	ST8SIA3	Upregulated
hsa-miR-139-5p	NIN	Upregulated
hsa-miR-139-5p	RRP15	Upregulated
hsa-miR-139-5p	KBTBD8	Upregulated
hsa-miR-139-5p	NXPH3	Upregulated
hsa-miR-139-5p	AKT3	Upregulated
hsa-miR-146a-3p	KIAA1324L	Upregulated
hsa-miR-146a-3p	SMIM10L1	Upregulated
hsa-miR-146a-3p	SERINC3	Upregulated
hsa-miR-146a-3p	MTMR9	Upregulated
hsa-miR-146a-3p	KIAA1549	Upregulated
hsa-miR-146a-5p	MYO1B	Upregulated
hsa-miR-146a-5p	MBTD1	Upregulated
hsa-miR-146a-5p	MTMR9	Upregulated
hsa-miR-146a-5p	PANK2	Upregulated
hsa-miR-146a-5p	PSMF1	Upregulated
hsa-miR-146a-5p	LDLRAD3	Upregulated
hsa-miR-146a-5p	WISP1	Upregulated
hsa-miR-146a-5p	DOCK1	Upregulated
hsa-miR-146a-5p	SELENON	Upregulated
hsa-miR-146a-5p	TM2D2	Upregulated
hsa-miR-146a-5p	EEF2K	Upregulated
hsa-miR-146a-5p	DOK6	Upregulated
hsa-miR-146a-5p	RNF26	Upregulated
hsa-miR-146a-5p	OXSR1	Upregulated
hsa-miR-146a-5p	USP9X	Upregulated
hsa-miR-146a-5p	ACSL1	Upregulated
hsa-miR-146a-5p	PPP1R10	Upregulated
hsa-miR-146a-5p	CDS2	Upregulated
hsa-miR-146a-5p	PDE10A	Upregulated
hsa-miR-146a-5p	KIF3B	Upregulated
hsa-miR-146a-5p	TRAK2	Upregulated
hsa-miR-146a-5p	JRK	Upregulated
hsa-miR-146b-5p	PSMF1	Upregulated
hsa-miR-146b-5p	CCDC42	Upregulated
hsa-miR-146b-5p	MYBL1	Upregulated
hsa-miR-146b-5p	PANK2	Upregulated
hsa-miR-146b-5p	TRAK2	Upregulated
hsa-miR-146b-5p	ZNF287	Upregulated
hsa-miR-146b-5p	CLOCK	Upregulated
hsa-miR-146b-5p	BTNL9	Upregulated
hsa-miR-146b-5p	SBNO1	Upregulated
hsa-miR-146b-5p	PPP1R10	Upregulated
hsa-miR-146b-5p	BRWD3	Upregulated
hsa-miR-146b-5p	LDLRAD3	Upregulated
hsa-miR-146b-5p	UMPS	Upregulated
hsa-miR-146b-5p	JRK	Upregulated
hsa-miR-146b-5p	SELENON	Upregulated
hsa-miR-146b-5p	MTMR9	Upregulated
hsa-miR-146b-5p	USP9X	Upregulated
hsa-miR-146b-5p	CDS2	Upregulated
hsa-miR-146b-5p	APPBP2	Upregulated
hsa-miR-146b-5p	PSMA5	Upregulated
hsa-miR-146b-5p	EEF2K	Upregulated
hsa-miR-146b-5p	KIAA1549L	Upregulated
hsa-miR-146b-5p	DOCK1	Upregulated
hsa-miR-146b-5p	TM2D2	Upregulated
hsa-miR-148b-3p	MTMR9	Upregulated
hsa-miR-148b-3p	ZBTB7A	Upregulated
hsa-miR-148b-3p	ASPH	Upregulated
hsa-miR-148b-3p	NIPA1	Upregulated
hsa-miR-148b-3p	ADGRF5	Upregulated
hsa-miR-148b-3p	PTGS2	Upregulated
hsa-miR-148b-3p	CPEB2	Upregulated
hsa-miR-148b-3p	MTPN	Upregulated
hsa-miR-148b-3p	CLEC16A	Upregulated
hsa-miR-155-5p	CADM2	Upregulated
hsa-miR-155-5p	ZBTB44	Upregulated
hsa-miR-155-5p	SBNO1	Upregulated
hsa-miR-155-5p	NEO1	Upregulated
hsa-miR-155-5p	PGK1	Upregulated
hsa-miR-155-5p	RABGAP1	Upregulated
hsa-miR-155-5p	THUMPD1	Upregulated
hsa-miR-16-2-3p	DARS	Upregulated
hsa-miR-16-2-3p	ZSWIM7	Upregulated
hsa-miR-16-2-3p	CCPG1	Upregulated
hsa-miR-17-5p	TANC1	Upregulated
hsa-miR-17-5p	CEP68	Upregulated
hsa-miR-17-5p	HSPA14	Upregulated
hsa-miR-17-5p	TRIM8	Upregulated
hsa-miR-17-5p	GALNT6	Upregulated
hsa-miR-17-5p	GABPB1	Upregulated
hsa-miR-17-5p	ARHGEF10	Upregulated
hsa-miR-17-5p	CAMK2D	Upregulated
hsa-miR-17-5p	IDS	Upregulated
hsa-miR-17-5p	FAM57A	Upregulated
hsa-miR-17-5p	PDGFRB	Upregulated
hsa-miR-17-5p	ATAD2	Upregulated
hsa-miR-17-5p	CADM2	Upregulated
hsa-miR-17-5p	RPL13	Upregulated
hsa-miR-17-5p	RGS4	Upregulated
hsa-miR-17-5p	GAB1	Upregulated
hsa-miR-17-5p	NAV2	Upregulated
hsa-miR-17-5p	KPNA2	Upregulated
hsa-miR-17-5p	RTCA	Upregulated
hsa-miR-17-5p	CCDC93	Upregulated
hsa-miR-17-5p	DNAL1	Upregulated
hsa-miR-17-5p	TMEM253	Upregulated
hsa-miR-17-5p	RERE	Upregulated
hsa-miR-17-5p	ATP6V0E1	Upregulated
hsa-miR-17-5p	PLXDC1	Upregulated
hsa-miR-17-5p	RELL1	Upregulated
hsa-miR-17-5p	ADAM12	Upregulated
hsa-miR-17-5p	BSCL2	Upregulated
hsa-miR-17-5p	TARDBP	Upregulated
hsa-miR-17-5p	MSL1	Upregulated
hsa-miR-17-5p	HIP1	Upregulated
hsa-miR-17-5p	SLC45A4	Upregulated
hsa-miR-17-5p	RABGAP1	Upregulated
hsa-miR-17-5p	INHBA	Upregulated
hsa-miR-17-5p	PTPRT	Upregulated
hsa-miR-17-5p	CLTC	Upregulated
hsa-miR-17-5p	SLC4A5	Upregulated
hsa-miR-17-5p	CHAF1A	Upregulated
hsa-miR-17-5p	PHKA2	Upregulated
hsa-miR-17-5p	E2F2	Upregulated
hsa-miR-1843	ELMSAN1	Upregulated
hsa-miR-1843	MRPL43	Upregulated
hsa-miR-1843	LMX1B	Upregulated
hsa-miR-1843	ALAD	Upregulated
hsa-miR-1843	TP53INP2	Upregulated
hsa-miR-1843	TARDBP	Upregulated
hsa-miR-1843	CAPNS1	Upregulated
hsa-miR-1843	SPG20	Upregulated
hsa-miR-1843	PSMF1	Upregulated
hsa-miR-1843	HIP1	Upregulated
hsa-miR-1843	EPB41L1	Upregulated
hsa-miR-1843	DNAL1	Upregulated
hsa-miR-1843	KPNA6	Upregulated
hsa-miR-1843	CSRP1	Upregulated
hsa-miR-1843	SLTM	Upregulated
hsa-miR-1843	SYNPO	Upregulated
hsa-miR-1843	ZMIZ2	Upregulated
hsa-miR-1843	PGK1	Upregulated
hsa-miR-1843	C2CD5	Upregulated
hsa-miR-1843	PTPRT	Upregulated
hsa-miR-1843	CCDC86	Upregulated
hsa-miR-1843	TBC1D9B	Upregulated
hsa-miR-1843	ATP6V0E1	Upregulated
hsa-miR-1843	USP31	Upregulated
hsa-miR-1843	RGS12	Upregulated
hsa-miR-1843	PLXNA1	Upregulated
hsa-miR-186-5p	CMPK1	Upregulated
hsa-miR-186-5p	PKP4	Upregulated
hsa-miR-186-5p	CHP1	Upregulated
hsa-miR-186-5p	JRK	Upregulated
hsa-miR-195-3p	ATXN3	Upregulated
hsa-miR-195-3p	ATP2B2	Upregulated
hsa-miR-195-3p	NCOA7	Upregulated
hsa-miR-195-3p	PSPH	Upregulated
hsa-miR-195-3p	RCC1	Upregulated
hsa-miR-195-3p	KPNA6	Upregulated
hsa-miR-195-3p	HORMAD1	Upregulated
hsa-miR-195-3p	NDC1	Upregulated
hsa-miR-195-3p	SSBP2	Upregulated
hsa-miR-195-3p	USP32	Upregulated
hsa-miR-195-3p	DERL2	Upregulated
hsa-miR-199a-3p	KTN1	Upregulated
hsa-miR-199a-3p	SBNO1	Upregulated
hsa-miR-199a-3p	KMT2A	Upregulated
hsa-miR-199a-3p	SIRPA	Upregulated
hsa-miR-199a-3p	BTN2A2	Upregulated
hsa-miR-199a-3p	ABCG4	Upregulated
hsa-miR-199a-3p	STK11	Upregulated
hsa-miR-199a-3p	UNC13C	Upregulated
hsa-miR-199a-3p	SLIT1	Upregulated
hsa-miR-199a-3p	ZNF217	Upregulated
hsa-miR-199a-3p	TAOK1	Upregulated
hsa-miR-199a-3p	WTH3DI	Upregulated
hsa-miR-199b-3p	SBNO1	Upregulated
hsa-miR-199b-3p	KTN1	Upregulated
hsa-miR-199b-3p	ZNF217	Upregulated
hsa-miR-199b-3p	BTN2A2	Upregulated
hsa-miR-199b-3p	KMT2A	Upregulated
hsa-miR-199b-3p	UNC13C	Upregulated
hsa-miR-199b-3p	SIRPA	Upregulated
hsa-miR-199b-3p	ABCG4	Upregulated
hsa-miR-199b-3p	SLIT1	Upregulated
hsa-miR-199b-3p	WTH3DI	Upregulated
hsa-miR-199b-3p	TAOK1	Upregulated
hsa-miR-199b-3p	STK11	Upregulated
hsa-miR-20a-5p	ABCG4	Upregulated
hsa-miR-20a-5p	ATP2B2	Upregulated
hsa-miR-20a-5p	CACNB4	Upregulated
hsa-miR-20a-5p	CEP57	Upregulated
hsa-miR-20a-5p	CAPRIN2	Upregulated
hsa-miR-20a-5p	CEP68	Upregulated
hsa-miR-20a-5p	GABRA2	Upregulated
hsa-miR-20a-5p	RBM20	Upregulated
hsa-miR-20a-5p	NFIB	Upregulated
hsa-miR-20a-5p	RNH1	Upregulated
hsa-miR-20a-5p	SSBP2	Upregulated
hsa-miR-20a-5p	PTPRT	Upregulated
hsa-miR-20a-5p	SFMBT1	Upregulated
hsa-miR-20a-5p	SZT2	Upregulated
hsa-miR-20a-5p	MTMR9	Upregulated
hsa-miR-20a-5p	CLOCK	Upregulated
hsa-miR-20a-5p	IL1RAP	Upregulated
hsa-miR-20a-5p	ANGPT2	Upregulated
hsa-miR-20a-5p	PANK2	Upregulated
hsa-miR-20a-5p	NIN	Upregulated
hsa-miR-20a-5p	SMIM14	Upregulated
hsa-miR-20a-5p	NIPA1	Upregulated
hsa-miR-20a-5p	TCF3	Upregulated
hsa-miR-20a-5p	SIRPB2	Upregulated
hsa-miR-20a-5p	PPP6C	Upregulated
hsa-miR-20a-5p	NFYA	Upregulated
hsa-miR-20a-5p	JRK	Upregulated
hsa-miR-20a-5p	DERL2	Upregulated
hsa-miR-20a-5p	DGKH	Upregulated
hsa-miR-20a-5p	CLEC16A	Upregulated
hsa-miR-20a-5p	ZNFX1	Upregulated
hsa-miR-20a-5p	TM2D2	Upregulated
hsa-miR-20a-5p	MAPK4	Upregulated
hsa-miR-20a-5p	GABBR1	Upregulated
hsa-miR-20a-5p	POLR3G	Upregulated
hsa-miR-20a-5p	KIF3B	Upregulated
hsa-miR-20a-5p	PIKFYVE	Upregulated
hsa-miR-20a-5p	DOK6	Upregulated
hsa-miR-20a-5p	C11orf58	Upregulated
hsa-miR-20a-5p	KDM1B	Upregulated
hsa-miR-20a-5p	C11orf63	Upregulated
hsa-miR-21-5p	RBFA	Upregulated
hsa-miR-21-5p	PDHA1	Upregulated
hsa-miR-21-5p	NUDT13	Upregulated
hsa-miR-21-5p	AGPAT5	Upregulated
hsa-miR-216a-5p	RPL36A-HNRNPH2	Upregulated
hsa-miR-216a-5p	NFIB	Upregulated
hsa-miR-216a-5p	EMCN	Upregulated
hsa-miR-216a-5p	YAF2	Upregulated
hsa-miR-216a-5p	NR3C1	Upregulated
hsa-miR-216a-5p	KIAA1191	Upregulated
hsa-miR-216a-5p	KLHL5	Upregulated
hsa-miR-216a-5p	LMX1B	Upregulated
hsa-miR-216a-5p	BLOC1S2	Upregulated
hsa-miR-216a-5p	PPP2R2C	Upregulated
hsa-miR-216a-5p	DDX3Y	Upregulated
hsa-miR-216a-5p	GOSR2	Upregulated
hsa-miR-216a-5p	JRK	Upregulated
hsa-miR-216a-5p	ST8SIA3	Upregulated
hsa-miR-216a-5p	ZBTB7A	Upregulated
hsa-miR-216a-5p	SIN3A	Upregulated
hsa-miR-216a-5p	KIAA1549	Upregulated
hsa-miR-216a-5p	BOD1L1	Upregulated
hsa-miR-216a-5p	DOK6	Upregulated
hsa-miR-216a-5p	SDC3	Upregulated
hsa-miR-216a-5p	ZFAND3	Upregulated
hsa-miR-216a-5p	LIPG	Upregulated
hsa-miR-216a-5p	FBXO47	Upregulated
hsa-miR-216a-5p	UNC13C	Upregulated
hsa-miR-216a-5p	TMEM144	Upregulated
hsa-miR-216a-5p	CLEC16A	Upregulated
hsa-miR-221-5p	ARMCX3	Upregulated
hsa-miR-221-5p	OSBPL8	Upregulated
hsa-miR-221-5p	KPNA6	Upregulated
hsa-miR-221-5p	PTPRT	Upregulated
hsa-miR-221-5p	FBXW2	Upregulated
hsa-miR-221-5p	AZIN1	Upregulated
hsa-miR-221-5p	QSER1	Upregulated
hsa-miR-221-5p	ATP1B1	Upregulated
hsa-miR-221-5p	LDLRAD2	Upregulated
hsa-miR-221-5p	PPP1CB	Upregulated
hsa-miR-221-5p	SLC45A4	Upregulated
hsa-miR-221-5p	SBNO1	Upregulated
hsa-miR-221-5p	ZCCHC3	Upregulated
hsa-miR-224-5p	PSMF1	Upregulated
hsa-miR-224-5p	MICAL3	Upregulated
hsa-miR-224-5p	CDS2	Upregulated
hsa-miR-224-5p	TMOD2	Upregulated
hsa-miR-224-5p	TBK1	Upregulated
hsa-miR-224-5p	RALA	Upregulated
hsa-miR-224-5p	DGKH	Upregulated
hsa-miR-224-5p	COMMD3-BMI1	Upregulated
hsa-miR-224-5p	SPTY2D1	Upregulated
hsa-miR-224-5p	FAM198B	Upregulated
hsa-miR-224-5p	GOSR2	Upregulated
hsa-miR-224-5p	BMI1	Upregulated
hsa-miR-224-5p	ANKRD40	Upregulated
hsa-miR-224-5p	ZNF469	Upregulated
hsa-miR-224-5p	NCR3LG1	Upregulated
hsa-miR-224-5p	KIAA1549	Upregulated
hsa-miR-224-5p	XK	Upregulated
hsa-miR-224-5p	KPNA6	Upregulated
hsa-miR-224-5p	WISP1	Upregulated
hsa-miR-224-5p	SOGA3	Upregulated
hsa-miR-23a-3p	PTPRT	Upregulated
hsa-miR-23a-3p	ETF1	Upregulated
hsa-miR-23a-3p	ATF6	Upregulated
hsa-miR-23a-3p	SCAF4	Upregulated
hsa-miR-23a-3p	TARDBP	Upregulated
hsa-miR-23a-3p	SALL2	Upregulated
hsa-miR-23a-3p	IRS1	Upregulated
hsa-miR-23a-3p	ADAM12	Upregulated
hsa-miR-24-3p	CYP11B1	Upregulated
hsa-miR-24-3p	ZBTB7A	Upregulated
hsa-miR-24-3p	IST1	Upregulated
hsa-miR-24-3p	SPATS2L	Upregulated
hsa-miR-24-3p	SIRPA	Upregulated
hsa-miR-24-3p	RCN3	Upregulated
hsa-miR-24-3p	PACS2	Upregulated
hsa-miR-24-3p	MAFF	Upregulated
hsa-miR-24-3p	TTYH3	Upregulated
hsa-miR-24-3p	TCF3	Upregulated
hsa-miR-24-3p	TRAF3	Upregulated
hsa-miR-24-3p	KIF3B	Upregulated
hsa-miR-24-3p	ATXN7L3	Upregulated
hsa-miR-24-3p	PDE2A	Upregulated
hsa-miR-24-3p	PPP2R2C	Upregulated
hsa-miR-24-3p	AMFR	Upregulated
hsa-miR-24-3p	KCNAB2	Upregulated
hsa-miR-24-3p	TOP1	Upregulated
hsa-miR-24-3p	CSK	Upregulated
hsa-miR-24-3p	DCAF11	Upregulated
hsa-miR-24-3p	AFAP1	Upregulated
hsa-miR-24-3p	BTN2A2	Upregulated
hsa-miR-24-3p	DBNDD1	Upregulated
hsa-miR-24-3p	AKAP13	Upregulated
hsa-miR-24-3p	SIN3A	Upregulated
hsa-miR-24-3p	UNC5B	Upregulated
hsa-miR-24-3p	MIDN	Upregulated
hsa-miR-24-3p	TAOK1	Upregulated
hsa-miR-24-3p	PDLIM7	Upregulated
hsa-miR-24-3p	CPT1A	Upregulated
hsa-miR-24-3p	LDLRAD3	Upregulated
hsa-miR-24-3p	NFYA	Upregulated
hsa-miR-24-3p	KATNB1	Upregulated
hsa-miR-24-3p	CTXN1	Upregulated
hsa-miR-24-3p	YAF2	Upregulated
hsa-miR-24-3p	JRK	Upregulated
hsa-miR-24-3p	ZNF217	Upregulated
hsa-miR-24-3p	CMTM7	Upregulated
hsa-miR-24-3p	SLC35B4	Upregulated
hsa-miR-24-3p	SPRN	Upregulated
hsa-miR-24-3p	SZT2	Upregulated
hsa-miR-24-3p	PSKH1	Upregulated
hsa-miR-24-3p	DENND5A	Upregulated
hsa-miR-24-3p	MTMR9	Upregulated
hsa-miR-24-3p	TM2D2	Upregulated
hsa-miR-24-3p	ST8SIA3	Upregulated
hsa-miR-24-3p	NCR3LG1	Upregulated
hsa-miR-24-3p	KMT2A	Upregulated
hsa-miR-24-3p	HOXB7	Upregulated
hsa-miR-24-3p	CLEC16A	Upregulated
hsa-miR-24-3p	PSMF1	Upregulated
hsa-miR-24-3p	RAPGEF2	Upregulated
hsa-miR-24-3p	ZC3H6	Upregulated
hsa-miR-24-3p	POLM	Upregulated
hsa-miR-24-3p	NUpregulated210	Upregulated
hsa-miR-24-3p	LIMD1	Upregulated
hsa-miR-24-3p	KIAA1549L	Upregulated
hsa-miR-24-3p	SERTAD1	Upregulated
hsa-miR-2682-5p	ZNF358	Upregulated
hsa-miR-2682-5p	SSR3	Upregulated
hsa-miR-2682-5p	TCF4	Upregulated
hsa-miR-2682-5p	STMN2	Upregulated
hsa-miR-2682-5p	TULP1	Upregulated
hsa-miR-2682-5p	CDS2	Upregulated
hsa-miR-2682-5p	CD14	Upregulated
hsa-miR-2682-5p	S100PBP	Upregulated
hsa-miR-2682-5p	PANK2	Upregulated
hsa-miR-2682-5p	SAMD4A	Upregulated
hsa-miR-2682-5p	GID8	Upregulated
hsa-miR-2682-5p	DBNDD1	Upregulated
hsa-miR-2682-5p	ELMSAN1	Upregulated
hsa-miR-2682-5p	NES	Upregulated
hsa-miR-2682-5p	RANBP3	Upregulated
hsa-miR-2682-5p	ERBIN	Upregulated
hsa-miR-2682-5p	NDC1	Upregulated
hsa-miR-2682-5p	ERG	Upregulated
hsa-miR-2682-5p	NCR3LG1	Upregulated
hsa-miR-2682-5p	ATXN7L3	Upregulated
hsa-miR-2682-5p	NCDN	Upregulated
hsa-miR-2682-5p	ALDH3B2	Upregulated
hsa-miR-2682-5p	SLC9A1	Upregulated
hsa-miR-2682-5p	CDC42SE1	Upregulated
hsa-miR-2682-5p	TMOD2	Upregulated
hsa-miR-2682-5p	JRK	Upregulated
hsa-miR-2682-5p	TAOK1	Upregulated
hsa-miR-2682-5p	RALA	Upregulated
hsa-miR-2682-5p	MICAL3	Upregulated
hsa-miR-2682-5p	COL5A2	Upregulated
hsa-miR-2682-5p	UBE2O	Upregulated
hsa-miR-2682-5p	ARSJ	Upregulated
hsa-miR-2682-5p	ST8SIA3	Upregulated
hsa-miR-2682-5p	ATP13A4	Upregulated
hsa-miR-2682-5p	DGKH	Upregulated
hsa-miR-2682-5p	KMT2A	Upregulated
hsa-miR-2682-5p	MTMR9	Upregulated
hsa-miR-2682-5p	PPP1R10	Upregulated
hsa-miR-2682-5p	FKBP1A	Upregulated
hsa-miR-2682-5p	TRA2B	Upregulated
hsa-miR-2682-5p	DAZAP2	Upregulated
hsa-miR-2682-5p	VEGFB	Upregulated
hsa-miR-26b-5p	KPNA6	Upregulated
hsa-miR-26b-5p	DNAL1	Upregulated
hsa-miR-26b-5p	HNRNPA3	Upregulated
hsa-miR-27a-3p	DIS3	Upregulated
hsa-miR-27a-3p	SMAD1	Upregulated
hsa-miR-27a-3p	UAP1	Upregulated
hsa-miR-27a-3p	LRRC27	Upregulated
hsa-miR-27a-3p	SASH1	Upregulated
hsa-miR-27a-3p	RAP2A	Upregulated
hsa-miR-27a-3p	GOLM1	Upregulated
hsa-miR-27a-3p	HIP1	Upregulated
hsa-miR-27a-3p	COL5A1	Upregulated
hsa-miR-27a-3p	PTPRT	Upregulated
hsa-miR-27a-3p	NRG1	Upregulated
hsa-miR-27a-3p	NUDT13	Upregulated
hsa-miR-27a-3p	GAB1	Upregulated
hsa-miR-27a-3p	USP31	Upregulated
hsa-miR-27a-3p	IRS1	Upregulated
hsa-miR-27a-3p	DCBLD2	Upregulated
hsa-miR-27a-3p	ALCAM	Upregulated
hsa-miR-27a-3p	VAMP3	Upregulated
hsa-miR-27b-3p	SASH1	Upregulated
hsa-miR-27b-3p	GAB1	Upregulated
hsa-miR-27b-3p	VAMP3	Upregulated
hsa-miR-27b-3p	NUDT13	Upregulated
hsa-miR-27b-3p	UBE2F	Upregulated
hsa-miR-27b-3p	KIAA1551	Upregulated
hsa-miR-27b-3p	DCBLD2	Upregulated
hsa-miR-27b-3p	LRRC27	Upregulated
hsa-miR-27b-3p	TTL	Upregulated
hsa-miR-27b-3p	IRS1	Upregulated
hsa-miR-27b-3p	NRG1	Upregulated
hsa-miR-27b-3p	ALCAM	Upregulated
hsa-miR-27b-3p	MTMR7	Upregulated
hsa-miR-27b-3p	MLIP	Upregulated
hsa-miR-27b-3p	MTMR9	Upregulated
hsa-miR-28-5p	CSF3	Upregulated
hsa-miR-28-5p	PTGS2	Upregulated
hsa-miR-28-5p	CBLN2	Upregulated
hsa-miR-28-5p	ACACA	Upregulated
hsa-miR-28-5p	NIPA1	Upregulated
hsa-miR-28-5p	SOGA3	Upregulated
hsa-miR-28-5p	DERL2	Upregulated
hsa-miR-28-5p	SHROOM4	Upregulated
hsa-miR-28-5p	WISP1	Upregulated
hsa-miR-28-5p	ELMSAN1	Upregulated
hsa-miR-28-5p	DOK6	Upregulated
hsa-miR-28-5p	ZNF217	Upregulated
hsa-miR-28-5p	RIMS4	Upregulated
hsa-miR-28-5p	OTUB1	Upregulated
hsa-miR-28-5p	SBNO1	Upregulated
hsa-miR-28-5p	TRA2B	Upregulated
hsa-miR-28-5p	USP9X	Upregulated
hsa-miR-28-5p	PTPRT	Upregulated
hsa-miR-28-5p	HNRNPDL	Upregulated
hsa-miR-29a-3p	ATP7B	Upregulated
hsa-miR-29a-3p	MAU2	Upregulated
hsa-miR-29a-3p	ROBO1	Upregulated
hsa-miR-29a-3p	HRH2	Upregulated
hsa-miR-29a-3p	AKAP13	Upregulated
hsa-miR-29a-3p	MICAL3	Upregulated
hsa-miR-30a-3p	ST8SIA3	Upregulated
hsa-miR-30a-3p	NAA25	Upregulated
hsa-miR-30a-3p	KIAA1462	Upregulated
hsa-miR-30a-3p	TCF4	Upregulated
hsa-miR-30a-3p	MIEF1	Upregulated
hsa-miR-30a-3p	KMT2A	Upregulated
hsa-miR-30a-3p	ACSL1	Upregulated
hsa-miR-30a-3p	ATP13A4	Upregulated
hsa-miR-30a-3p	FNDC5	Upregulated
hsa-miR-30a-3p	COL5A2	Upregulated
hsa-miR-30a-3p	MNT	Upregulated
hsa-miR-30a-3p	KPNA6	Upregulated
hsa-miR-30a-3p	LIMA1	Upregulated
hsa-miR-30a-3p	NDC1	Upregulated
hsa-miR-30a-3p	RMND5A	Upregulated
hsa-miR-30a-3p	WISP1	Upregulated
hsa-miR-30a-3p	RAPGEF2	Upregulated
hsa-miR-30a-3p	HAUS6	Upregulated
hsa-miR-30a-3p	UBE2K	Upregulated
hsa-miR-30a-3p	MCTP1	Upregulated
hsa-miR-30a-3p	DGKH	Upregulated
hsa-miR-30a-3p	TSC22D3	Upregulated
hsa-miR-30a-3p	HLA-B	Upregulated
hsa-miR-30a-3p	SOGA3	Upregulated
hsa-miR-30a-3p	ZFAND3	Upregulated
hsa-miR-323a-3p	HAUS6	Upregulated
hsa-miR-323b-3p	INHBA	Upregulated
hsa-miR-329-3p	NR3C1	Upregulated
hsa-miR-329-3p	TAF1	Upregulated
hsa-miR-329-3p	ACVRL1	Upregulated
hsa-miR-329-3p	ENAH	Upregulated
hsa-miR-329-3p	EPPK1	Upregulated
hsa-miR-329-3p	ADGRF5	Upregulated
hsa-miR-329-3p	RALA	Upregulated
hsa-miR-329-3p	MTMR9	Upregulated
hsa-miR-337-3p	TCF4	Upregulated
hsa-miR-337-3p	KMT2A	Upregulated
hsa-miR-3605-5p	XPNPEP2	Upregulated
hsa-miR-3605-5p	MNT	Upregulated
hsa-miR-3605-5p	SBNO1	Upregulated
hsa-miR-3605-5p	HIVEP3	Upregulated
hsa-miR-3605-5p	URM1	Upregulated
hsa-miR-3605-5p	C1QTNF1	Upregulated
hsa-miR-3605-5p	TPGS2	Upregulated
hsa-miR-3605-5p	GAB2	Upregulated
hsa-miR-3605-5p	ROBO4	Upregulated
hsa-miR-3605-5p	ACVRL1	Upregulated
hsa-miR-3605-5p	RBFOX1	Upregulated
hsa-miR-3605-5p	MEF2A	Upregulated
hsa-miR-3605-5p	PTPRT	Upregulated
hsa-miR-3605-5p	STAT6	Upregulated
hsa-miR-3605-5p	BRWD3	Upregulated
hsa-miR-3605-5p	CACNB4	Upregulated
hsa-miR-3605-5p	MTMR9	Upregulated
hsa-miR-3605-5p	SZT2	Upregulated
hsa-miR-3605-5p	KMT2A	Upregulated
hsa-miR-3605-5p	KIAA1324L	Upregulated
hsa-miR-3605-5p	UEVLD	Upregulated
hsa-miR-3605-5p	FNDC5	Upregulated
hsa-miR-3605-5p	CABLES1	Upregulated
hsa-miR-3605-5p	RAPGEF1	Upregulated
hsa-miR-3605-5p	SLC7A2	Upregulated
hsa-miR-3605-5p	ABCG4	Upregulated
hsa-miR-3605-5p	ATP6V1G2	Upregulated
hsa-miR-3605-5p	ELMSAN1	Upregulated
hsa-miR-3605-5p	NCOA7	Upregulated
hsa-miR-3605-5p	AFAP1	Upregulated
hsa-miR-3605-5p	NUpregulated205	Upregulated
hsa-miR-3605-5p	FAM198B	Upregulated
hsa-miR-3605-5p	SOX13	Upregulated
hsa-miR-3605-5p	SIRPB2	Upregulated
hsa-miR-3605-5p	PHC2	Upregulated
hsa-miR-3605-5p	JRK	Upregulated
hsa-miR-3605-5p	MIDN	Upregulated
hsa-miR-3605-5p	DBNDD1	Upregulated
hsa-miR-3605-5p	MICAL3	Upregulated
hsa-miR-3605-5p	CEBPZOS	Upregulated
hsa-miR-3605-5p	PANK2	Upregulated
hsa-miR-3605-5p	RNF123	Upregulated
hsa-miR-3605-5p	MIEF1	Upregulated
hsa-miR-3605-5p	EDN1	Upregulated
hsa-miR-3605-5p	SMIM10L1	Upregulated
hsa-miR-3605-5p	KANSL1	Upregulated
hsa-miR-3605-5p	AKAP13	Upregulated
hsa-miR-3605-5p	PPP6C	Upregulated
hsa-miR-3605-5p	ASPH	Upregulated
hsa-miR-3605-5p	PTCH1	Upregulated
hsa-miR-3605-5p	FMNL1	Upregulated
hsa-miR-3605-5p	APPBP2	Upregulated
hsa-miR-3605-5p	LRP3	Upregulated
hsa-miR-3605-5p	SLC9A1	Upregulated
hsa-miR-3605-5p	SRGAP2	Upregulated
hsa-miR-3605-5p	RBM20	Upregulated
hsa-miR-3605-5p	IL6ST	Upregulated
hsa-miR-3605-5p	AFAP1L1	Upregulated
hsa-miR-3605-5p	PEX19	Upregulated
hsa-miR-3605-5p	GID8	Upregulated
hsa-miR-3605-5p	CLOCK	Upregulated
hsa-miR-3605-5p	GABBR1	Upregulated
hsa-miR-3605-5p	ZBTB7A	Upregulated
hsa-miR-3605-5p	FNDC4	Upregulated
hsa-miR-3605-5p	KIF3B	Upregulated
hsa-miR-3605-5p	TRIOBP	Upregulated
hsa-miR-3605-5p	EFTUD2	Upregulated
hsa-miR-3605-5p	SPATS2L	Upregulated
hsa-miR-3605-5p	TMOD2	Upregulated
hsa-miR-3605-5p	GNB1	Upregulated
hsa-miR-3605-5p	LMX1B	Upregulated
hsa-miR-3605-5p	TESMIN	Upregulated
hsa-miR-3605-5p	ATP2B2	Upregulated
hsa-miR-3605-5p	ENAH	Upregulated
hsa-miR-3605-5p	SOGA3	Upregulated
hsa-miR-3605-5p	KPNA6	Upregulated
hsa-miR-3605-5p	SELENON	Upregulated
hsa-miR-3605-5p	PSKH1	Upregulated
hsa-miR-3605-5p	APLN	Upregulated
hsa-miR-3605-5p	ZFAND3	Upregulated
hsa-miR-3605-5p	AKT3	Upregulated
hsa-miR-3605-5p	CX3CL1	Upregulated
hsa-miR-3605-5p	WDR6	Upregulated
hsa-miR-3605-5p	AGGF1	Upregulated
hsa-miR-3605-5p	TCF3	Upregulated
hsa-miR-3605-5p	KIAA1462	Upregulated
hsa-miR-365a-3p	TBCEL	Upregulated
hsa-miR-365b-3p	TBCEL	Upregulated
hsa-miR-381-3p	GAS2	Upregulated
hsa-miR-381-3p	MNT	Upregulated
hsa-miR-381-3p	SLC7A2	Upregulated
hsa-miR-381-3p	DERL2	Upregulated
hsa-miR-381-3p	FAM204A	Upregulated
hsa-miR-381-3p	CEBPG	Upregulated
hsa-miR-381-3p	MTMR9	Upregulated
hsa-miR-381-3p	ZFAND3	Upregulated
hsa-miR-381-3p	ENAH	Upregulated
hsa-miR-381-3p	RBMS3	Upregulated
hsa-miR-381-3p	JRK	Upregulated
hsa-miR-381-3p	DOK6	Upregulated
hsa-miR-381-3p	CDS2	Upregulated
hsa-miR-381-3p	TMOD3	Upregulated
hsa-miR-409-5p	PDE10A	Upregulated
hsa-miR-409-5p	SSR3	Upregulated
hsa-miR-409-5p	USP9X	Upregulated
hsa-miR-409-5p	KIAA1549	Upregulated
hsa-miR-409-5p	ASPH	Upregulated
hsa-miR-409-5p	AFAP1	Upregulated
hsa-miR-409-5p	MICAL3	Upregulated
hsa-miR-409-5p	RRP15	Upregulated
hsa-miR-421	ZNF391	Upregulated
hsa-miR-421	DOK6	Upregulated
hsa-miR-421	RHOBTB1	Upregulated
hsa-miR-421	NFYA	Upregulated
hsa-miR-421	RASA3	Upregulated
hsa-miR-421	SPATS2L	Upregulated
hsa-miR-421	EFTUD2	Upregulated
hsa-miR-421	AKT3	Upregulated
hsa-miR-421	EMCN	Upregulated
hsa-miR-421	DGKH	Upregulated
hsa-miR-421	HIVEP3	Upregulated
hsa-miR-421	SLIT1	Upregulated
hsa-miR-421	KIAA1549L	Upregulated
hsa-miR-421	ZNF678	Upregulated
hsa-miR-421	PCDH12	Upregulated
hsa-miR-431-3p	CEP68	Upregulated
hsa-miR-431-3p	CDC42BPB	Upregulated
hsa-miR-431-3p	SNRPD3	Upregulated
hsa-miR-431-3p	ZNF362	Upregulated
hsa-miR-431-3p	CYP11B1	Upregulated
hsa-miR-431-3p	FRG2C	Upregulated
hsa-miR-431-3p	RND1	Upregulated
hsa-miR-431-5p	SQSTM1	Upregulated
hsa-miR-431-5p	SLCO2B1	Upregulated
hsa-miR-431-5p	CDS2	Upregulated
hsa-miR-431-5p	ZBTB7A	Upregulated
hsa-miR-431-5p	AFAP1L1	Upregulated
hsa-miR-431-5p	MICAL3	Upregulated
hsa-miR-431-5p	EIF2S2	Upregulated
hsa-miR-431-5p	SLC7A2	Upregulated
hsa-miR-431-5p	PDHB	Upregulated
hsa-miR-431-5p	PANK2	Upregulated
hsa-miR-431-5p	LIMD1	Upregulated
hsa-miR-431-5p	DPY19L3	Upregulated
hsa-miR-431-5p	AFAP1	Upregulated
hsa-miR-431-5p	SHROOM4	Upregulated
hsa-miR-431-5p	ANGPT2	Upregulated
hsa-miR-431-5p	ADGRL2	Upregulated
hsa-miR-431-5p	SNX8	Upregulated
hsa-miR-431-5p	WTH3DI	Upregulated
hsa-miR-431-5p	SPRN	Upregulated
hsa-miR-431-5p	SPATS2L	Upregulated
hsa-miR-431-5p	RBMS3	Upregulated
hsa-miR-431-5p	KIAA1549L	Upregulated
hsa-miR-432-5p	AKAP13	Upregulated
hsa-miR-432-5p	SSBP2	Upregulated
hsa-miR-432-5p	MICAL3	Upregulated
hsa-miR-432-5p	SLBP	Upregulated
hsa-miR-432-5p	CLEC16A	Upregulated
hsa-miR-432-5p	RNF214	Upregulated
hsa-miR-432-5p	MNT	Upregulated
hsa-miR-432-5p	RBFOX1	Upregulated
hsa-miR-432-5p	FYCO1	Upregulated
hsa-miR-432-5p	DBNDD1	Upregulated
hsa-miR-432-5p	TRAF3	Upregulated
hsa-miR-432-5p	DEF8	Upregulated
hsa-miR-432-5p	MYLK4	Upregulated
hsa-miR-432-5p	GOSR2	Upregulated
hsa-miR-432-5p	LRPPRC	Upregulated
hsa-miR-432-5p	ENAH	Upregulated
hsa-miR-432-5p	DST	Upregulated
hsa-miR-432-5p	KIAA1462	Upregulated
hsa-miR-432-5p	NFIB	Upregulated
hsa-miR-432-5p	DGKH	Upregulated
hsa-miR-432-5p	SIRPB2	Upregulated
hsa-miR-432-5p	LMX1B	Upregulated
hsa-miR-432-5p	EEF2K	Upregulated
hsa-miR-432-5p	NRCAM	Upregulated
hsa-miR-432-5p	DESI2	Upregulated
hsa-miR-432-5p	KCNAB2	Upregulated
hsa-miR-432-5p	MTMR9	Upregulated
hsa-miR-432-5p	NYAP2	Upregulated
hsa-miR-432-5p	SPRN	Upregulated
hsa-miR-432-5p	AFAP1L1	Upregulated
hsa-miR-432-5p	LRRC1	Upregulated
hsa-miR-432-5p	EFTUD2	Upregulated
hsa-miR-432-5p	NSF	Upregulated
hsa-miR-432-5p	XPNPEP2	Upregulated
hsa-miR-432-5p	SZT2	Upregulated
hsa-miR-432-5p	PSMF1	Upregulated
hsa-miR-432-5p	PTPRT	Upregulated
hsa-miR-432-5p	IL6ST	Upregulated
hsa-miR-432-5p	TMOD2	Upregulated
hsa-miR-432-5p	KPNA6	Upregulated
hsa-miR-432-5p	OXSR1	Upregulated
hsa-miR-432-5p	CNNM4	Upregulated
hsa-miR-432-5p	EPS15L1	Upregulated
hsa-miR-432-5p	ADAL	Upregulated
hsa-miR-432-5p	EYA3	Upregulated
hsa-miR-432-5p	DDI2	Upregulated
hsa-miR-432-5p	UBR2	Upregulated
hsa-miR-432-5p	AKT3	Upregulated
hsa-miR-432-5p	TCF3	Upregulated
hsa-miR-432-5p	PCNT	Upregulated
hsa-miR-432-5p	TM2D2	Upregulated
hsa-miR-432-5p	RMND5A	Upregulated
hsa-miR-432-5p	SOGA3	Upregulated
hsa-miR-432-5p	HIVEP3	Upregulated
hsa-miR-432-5p	NCR3LG1	Upregulated
hsa-miR-432-5p	CX3CL1	Upregulated
hsa-miR-432-5p	SPTY2D1	Upregulated
hsa-miR-432-5p	NES	Upregulated
hsa-miR-432-5p	SHROOM4	Upregulated
hsa-miR-432-5p	NCAPG	Upregulated
hsa-miR-432-5p	FOXN2	Upregulated
hsa-miR-432-5p	ABCA3	Upregulated
hsa-miR-433-3p	ETS2	Upregulated
hsa-miR-433-3p	TYMS	Upregulated
hsa-miR-433-3p	GID8	Upregulated
hsa-miR-433-3p	LRRC6	Upregulated
hsa-miR-433-3p	GOSR2	Upregulated
hsa-miR-433-3p	CACNB4	Upregulated
hsa-miR-433-3p	ATP2B2	Upregulated
hsa-miR-433-3p	PSG8	Upregulated
hsa-miR-433-3p	EPPK1	Upregulated
hsa-miR-433-3p	MIEF1	Upregulated
hsa-miR-433-3p	SSBP2	Upregulated
hsa-miR-433-3p	PTPRT	Upregulated
hsa-miR-433-3p	CDS2	Upregulated
hsa-miR-433-3p	NFIB	Upregulated
hsa-miR-433-3p	AKT3	Upregulated
hsa-miR-433-3p	SPATS2L	Upregulated
hsa-miR-433-3p	KPNA5	Upregulated
hsa-miR-433-3p	MICAL3	Upregulated
hsa-miR-433-3p	ITPKC	Upregulated
hsa-miR-433-3p	KLHL5	Upregulated
hsa-miR-433-3p	ZRANB3	Upregulated
hsa-miR-433-3p	ENAH	Upregulated
hsa-miR-433-3p	FKBP1A	Upregulated
hsa-miR-433-3p	NID1	Upregulated
hsa-miR-433-3p	MYO9B	Upregulated
hsa-miR-455-5p	HIST2H2BE	Upregulated
hsa-miR-455-5p	PPP1R18	Upregulated
hsa-miR-455-5p	ERBIN	Upregulated
hsa-miR-455-5p	TBL1XR1	Upregulated
hsa-miR-455-5p	RMND5A	Upregulated
hsa-miR-455-5p	MEF2A	Upregulated
hsa-miR-455-5p	TMOD2	Upregulated
hsa-miR-455-5p	RPL36A-HNRNPH2	Upregulated
hsa-miR-455-5p	KANSL1	Upregulated
hsa-miR-455-5p	ACACA	Upregulated
hsa-miR-455-5p	ACTN1	Upregulated
hsa-miR-455-5p	TRAF3	Upregulated
hsa-miR-455-5p	DAZAP2	Upregulated
hsa-miR-455-5p	SOGA3	Upregulated
hsa-miR-455-5p	ZNF451	Upregulated
hsa-miR-485-3p	ZSWIM7	Upregulated
hsa-miR-485-3p	CCPG1	Upregulated
hsa-miR-485-3p	KIAA1324L	Upregulated
hsa-miR-485-3p	ZNF575	Upregulated
hsa-miR-485-3p	TTL	Upregulated
hsa-miR-485-3p	NRAS	Upregulated
hsa-miR-485-3p	RTF1	Upregulated
hsa-miR-485-3p	ME2	Upregulated
hsa-miR-485-3p	CSF2RB	Upregulated
hsa-miR-485-3p	IRS1	Upregulated
hsa-miR-495-3p	ST8SIA3	Upregulated
hsa-miR-495-3p	PDHA1	Upregulated
hsa-miR-495-3p	SMIM14	Upregulated
hsa-miR-495-3p	RBM20	Upregulated
hsa-miR-495-3p	SLTM	Upregulated
hsa-miR-495-3p	ELK1	Upregulated
hsa-miR-495-3p	TTYH3	Upregulated
hsa-miR-495-3p	EIF4G3	Upregulated
hsa-miR-495-3p	TESMIN	Upregulated
hsa-miR-495-3p	TAF1	Upregulated
hsa-miR-495-3p	BRWD3	Upregulated
hsa-miR-495-3p	TDRD1	Upregulated
hsa-miR-495-3p	ROBO1	Upregulated
hsa-miR-495-3p	SLC35F2	Upregulated
hsa-miR-495-3p	IL1RAP	Upregulated
hsa-miR-495-3p	VMAC	Upregulated
hsa-miR-495-3p	ZC3H6	Upregulated
hsa-miR-500a-3p	JRK	Upregulated
hsa-miR-500a-3p	UNC5B	Upregulated
hsa-miR-500a-3p	HIVEP3	Upregulated
hsa-miR-500a-3p	WISP1	Upregulated
hsa-miR-500a-3p	TMOD2	Upregulated
hsa-miR-500a-3p	ELMSAN1	Upregulated
hsa-miR-500a-3p	TP53INP2	Upregulated
hsa-miR-500a-3p	PRKCDBP	Upregulated
hsa-miR-500a-3p	TDRD1	Upregulated
hsa-miR-500a-3p	DDX3Y	Upregulated
hsa-miR-500a-3p	PSMF1	Upregulated
hsa-miR-500a-3p	PANK2	Upregulated
hsa-miR-500a-3p	KIAA1462	Upregulated
hsa-miR-500a-3p	FRMD8	Upregulated
hsa-miR-500a-3p	SELENON	Upregulated
hsa-miR-500a-3p	LMX1B	Upregulated
hsa-miR-500a-3p	ARIH1	Upregulated
hsa-miR-500a-3p	CNNM4	Upregulated
hsa-miR-500a-3p	ST8SIA3	Upregulated
hsa-miR-500a-3p	ELK1	Upregulated
hsa-miR-500a-3p	SERINC3	Upregulated
hsa-miR-500a-3p	C11orf63	Upregulated
hsa-miR-500a-3p	ACVRL1	Upregulated
hsa-miR-500a-3p	CX3CL1	Upregulated
hsa-miR-500a-3p	KIAA1549L	Upregulated
hsa-miR-500a-3p	S100PBP	Upregulated
hsa-miR-500a-3p	KDM4A	Upregulated
hsa-miR-500a-3p	ANGPT2	Upregulated
hsa-miR-500a-3p	DST	Upregulated
hsa-miR-500a-3p	OXSR1	Upregulated
hsa-miR-500a-3p	HOXC13	Upregulated
hsa-miR-500a-3p	RND1	Upregulated
hsa-miR-505-3p	TCF4	Upregulated
hsa-miR-505-3p	TBL1XR1	Upregulated
hsa-miR-505-3p	RFXAP	Upregulated
hsa-miR-505-3p	PSMF1	Upregulated
hsa-miR-505-3p	IL1RL1	Upregulated
hsa-miR-505-3p	RBMS3	Upregulated
hsa-miR-505-3p	ATP13A4	Upregulated
hsa-miR-505-3p	PIP5K1A	Upregulated
hsa-miR-505-3p	CDC42SE2	Upregulated
hsa-miR-505-3p	SOGA3	Upregulated
hsa-miR-505-3p	PITPNB	Upregulated
hsa-miR-505-3p	CPT1A	Upregulated
hsa-miR-505-3p	RAN	Upregulated
hsa-miR-505-3p	ENY2	Upregulated
hsa-miR-505-3p	EEF2K	Upregulated
hsa-miR-505-3p	DERL2	Upregulated
hsa-miR-505-3p	URM1	Upregulated
hsa-miR-505-3p	XK	Upregulated
hsa-miR-505-3p	DOK6	Upregulated
hsa-miR-505-3p	ZNF451	Upregulated
hsa-miR-543	FDFT1	Upregulated
hsa-miR-543	GAB1	Upregulated
hsa-miR-543	SERPINB9	Upregulated
hsa-miR-543	TRAK2	Upregulated
hsa-miR-574-3p	APLN	Upregulated
hsa-miR-574-3p	SBF1	Upregulated
hsa-miR-574-3p	CSE1L	Upregulated
hsa-miR-574-3p	EFTUD2	Upregulated
hsa-miR-654-3p	HNRNPH3	Upregulated
hsa-miR-654-3p	GLUD1	Upregulated
hsa-miR-654-3p	FAM198B	Upregulated
hsa-miR-654-3p	KIAA1549L	Upregulated
hsa-miR-654-3p	SSBP2	Upregulated
hsa-miR-654-3p	SLC35B4	Upregulated
hsa-miR-654-3p	SLC5A1	Upregulated
hsa-miR-654-3p	BTN2A2	Upregulated
hsa-miR-654-3p	EMCN	Upregulated
hsa-miR-654-3p	MEF2A	Upregulated
hsa-miR-654-3p	SLC24A1	Upregulated
hsa-miR-654-3p	GAB2	Upregulated
hsa-miR-654-3p	CDC42BPB	Upregulated
hsa-miR-654-3p	SPATS2L	Upregulated
hsa-miR-660-5p	DCBLD2	Upregulated
hsa-miR-660-5p	HSPA14	Upregulated
hsa-miR-6891-5p	SSBP2	Upregulated
hsa-miR-6891-5p	EGR3	Upregulated
hsa-miR-6891-5p	ZNF469	Upregulated
hsa-miR-6891-5p	CISD1	Upregulated
hsa-miR-6891-5p	ING4	Upregulated
hsa-miR-6891-5p	ATXN3	Upregulated
hsa-miR-6891-5p	WTH3DI	Upregulated
hsa-miR-6891-5p	NFIB	Upregulated
hsa-miR-6891-5p	SLC7A2	Upregulated
hsa-miR-6891-5p	PTPN3	Upregulated
hsa-miR-6891-5p	PCBP2	Upregulated
hsa-miR-6891-5p	ABCG4	Upregulated
hsa-miR-6891-5p	NRBP1	Upregulated
hsa-miR-6891-5p	TPM3	Upregulated
hsa-miR-6891-5p	TCF4	Upregulated
hsa-miR-6891-5p	NCOA7	Upregulated
hsa-miR-6891-5p	DBNDD1	Upregulated
hsa-miR-6891-5p	BRWD3	Upregulated
hsa-miR-6891-5p	BCL2L2-PABPN1	Upregulated
hsa-miR-6891-5p	PHC2	Upregulated
hsa-miR-6891-5p	PPP2R2C	Upregulated
hsa-miR-6891-5p	NID1	Upregulated
hsa-miR-6891-5p	MIDN	Upregulated
hsa-miR-6891-5p	ATXN7L3	Upregulated
hsa-miR-6891-5p	TRIOBP	Upregulated
hsa-miR-6891-5p	PPP6C	Upregulated
hsa-miR-6891-5p	TTYH3	Upregulated
hsa-miR-6891-5p	SDC3	Upregulated
hsa-miR-6891-5p	URM1	Upregulated
hsa-miR-6891-5p	MSN	Upregulated
hsa-miR-6891-5p	TMEM189-UBE2V1	Upregulated
hsa-miR-6891-5p	ARFGAP3	Upregulated
hsa-miR-6891-5p	CHP1	Upregulated
hsa-miR-6891-5p	ZNF287	Upregulated
hsa-miR-6891-5p	FNDC5	Upregulated
hsa-miR-6891-5p	SPRN	Upregulated
hsa-miR-6891-5p	HIVEP3	Upregulated
hsa-miR-6891-5p	CDS2	Upregulated
hsa-miR-6891-5p	KIAA1462	Upregulated
hsa-miR-6891-5p	ELMSAN1	Upregulated
hsa-miR-6891-5p	ATP2B2	Upregulated
hsa-miR-6891-5p	KIAA0141	Upregulated
hsa-miR-6891-5p	LDLRAD3	Upregulated
hsa-miR-6891-5p	MAMDC2	Upregulated
hsa-miR-6891-5p	ZNF391	Upregulated
hsa-miR-6891-5p	SLC9A1	Upregulated
hsa-miR-6891-5p	TBCEL	Upregulated
hsa-miR-6891-5p	PACS2	Upregulated
hsa-miR-6891-5p	KIAA1191	Upregulated
hsa-miR-6891-5p	LRRC6	Upregulated
hsa-miR-6891-5p	STAT6	Upregulated
hsa-miR-6891-5p	PTPRS	Upregulated
hsa-miR-6891-5p	ENAH	Upregulated
hsa-miR-6891-5p	ABCF2	Upregulated
hsa-miR-6891-5p	GAB2	Upregulated
hsa-miR-6891-5p	RIMS4	Upregulated
hsa-miR-6891-5p	RANBP3	Upregulated
hsa-miR-6891-5p	NXPH3	Upregulated
hsa-miR-6891-5p	TRAF3	Upregulated
hsa-miR-6891-5p	CDC42SE1	Upregulated
hsa-miR-6891-5p	FYCO1	Upregulated
hsa-miR-6891-5p	NIPA1	Upregulated
hsa-miR-6891-5p	ANKRD40	Upregulated
hsa-miR-6891-5p	TCF3	Upregulated
hsa-miR-6891-5p	ZC3H18	Upregulated
hsa-miR-6891-5p	SZT2	Upregulated
hsa-miR-6891-5p	DGKH	Upregulated
hsa-miR-6891-5p	RRP15	Upregulated
hsa-miR-6891-5p	ATP6V1G2	Upregulated
hsa-miR-6891-5p	METRN	Upregulated
hsa-miR-6891-5p	SLIT1	Upregulated
hsa-miR-6891-5p	AKAP13	Upregulated
hsa-miR-6891-5p	ZBTB7A	Upregulated
hsa-miR-6891-5p	EYA3	Upregulated
hsa-miR-6891-5p	CX3CL1	Upregulated
hsa-miR-6891-5p	RHOBTB1	Upregulated
hsa-miR-6891-5p	OTUB1	Upregulated
hsa-miR-6891-5p	PAK4	Upregulated
hsa-miR-6891-5p	SLC24A1	Upregulated
hsa-miR-6891-5p	PSMF1	Upregulated
hsa-miR-6891-5p	PABPN1	Upregulated
hsa-miR-6891-5p	FARSA	Upregulated
hsa-miR-6891-5p	KDM4A	Upregulated
hsa-miR-6891-5p	DOCK1	Upregulated
hsa-miR-6891-5p	GABBR1	Upregulated
hsa-miR-6891-5p	SAMD4A	Upregulated
hsa-miR-6891-5p	PRMT8	Upregulated
hsa-miR-6891-5p	RAPGEF1	Upregulated
hsa-miR-6891-5p	SRGAP2	Upregulated
hsa-miR-6891-5p	FRMD8	Upregulated
hsa-miR-6891-5p	UNC5B	Upregulated
hsa-miR-6891-5p	LMX1B	Upregulated
hsa-miR-6891-5p	LIMD1	Upregulated
hsa-miR-6891-5p	CMTM7	Upregulated
hsa-miR-6891-5p	C11orf95	Upregulated
hsa-miR-6891-5p	HS1BP3	Upregulated
hsa-miR-6891-5p	PSKH1	Upregulated
hsa-miR-6891-5p	KMT2A	Upregulated
hsa-miR-6891-5p	TAOK1	Upregulated
hsa-miR-6891-5p	PRR13	Upregulated
hsa-miR-6891-5p	FAM134C	Upregulated
hsa-miR-6891-5p	TMOD2	Upregulated
hsa-miR-6891-5p	TP53INP2	Upregulated
hsa-miR-6891-5p	KANSL1	Upregulated
hsa-miR-6891-5p	ZFAND3	Upregulated
hsa-miR-6891-5p	CAPN15	Upregulated
hsa-miR-6891-5p	EIF5A2	Upregulated
hsa-miR-6891-5p	FAM204A	Upregulated
hsa-miR-6891-5p	SBNO1	Upregulated
hsa-miR-6891-5p	ST8SIA3	Upregulated
hsa-miR-6891-5p	TESMIN	Upregulated
hsa-miR-6891-5p	C11orf58	Upregulated
hsa-miR-6891-5p	SHROOM4	Upregulated
hsa-miR-6891-5p	AGAP3	Upregulated
hsa-miR-6891-5p	KIAA1211	Upregulated
hsa-miR-6891-5p	OXSR1	Upregulated
hsa-miR-6891-5p	TPR	Upregulated
hsa-miR-6891-5p	JRK	Upregulated
hsa-miR-6891-5p	APLN	Upregulated
hsa-miR-6891-5p	RNF26	Upregulated
hsa-miR-6891-5p	SHC1	Upregulated
hsa-miR-6891-5p	ZNFX1	Upregulated
hsa-miR-6891-5p	PMF1	Upregulated
hsa-miR-6891-5p	HOXC13	Upregulated
hsa-miR-6891-5p	RBM20	Upregulated
hsa-miR-6891-5p	FKBP8	Upregulated
hsa-miR-6891-5p	LAMA5	Upregulated
hsa-miR-6891-5p	ADGRA1	Upregulated
hsa-miR-6891-5p	XPNPEP2	Upregulated
hsa-miR-6891-5p	ZC3H6	Upregulated
hsa-miR-6891-5p	KIAA1549	Upregulated
hsa-miR-6891-5p	ARIH1	Upregulated
hsa-miR-6891-5p	ZNF451	Upregulated
hsa-miR-6891-5p	DOK6	Upregulated
hsa-miR-6891-5p	PITPNB	Upregulated
hsa-miR-6891-5p	RNF123	Upregulated
hsa-miR-6891-5p	RAB11B	Upregulated
hsa-miR-6891-5p	CBLN2	Upregulated
hsa-miR-6891-5p	SPATS2L	Upregulated
hsa-miR-6891-5p	MICAL3	Upregulated
hsa-miR-7-5p	KIAA1549	Upregulated
hsa-miR-7-5p	SQSTM1	Upregulated
hsa-miR-7-5p	IST1	Upregulated
hsa-miR-7-5p	GABRA2	Upregulated
hsa-miR-7-5p	ZNF287	Upregulated
hsa-miR-7-5p	SLC5A1	Upregulated
hsa-miR-7-5p	EMCN	Upregulated
hsa-miR-7-5p	DGKH	Upregulated
hsa-miR-7-5p	CACNB4	Upregulated
hsa-miR-7-5p	PEX19	Upregulated
hsa-miR-7-5p	DERL2	Upregulated
hsa-miR-7-5p	FYCO1	Upregulated
hsa-miR-7-5p	NSMAF	Upregulated
hsa-miR-7-5p	C1QTNF1	Upregulated
hsa-miR-7-5p	USP9X	Upregulated
hsa-miR-7-5p	ADGRL2	Upregulated
hsa-miR-7-5p	SLIT1	Upregulated
hsa-miR-7-5p	HECW2	Upregulated
hsa-miR-7-5p	MAU2	Upregulated
hsa-miR-7-5p	LIMD1	Upregulated
hsa-miR-7-5p	ITPKC	Upregulated
hsa-miR-7-5p	TAF1	Upregulated
hsa-miR-7-5p	TMEM189-UBE2V1	Upregulated
hsa-miR-7-5p	CLIP1	Upregulated
hsa-miR-7-5p	ANKRD50	Upregulated
hsa-miR-7-5p	CLOCK	Upregulated
hsa-miR-7-5p	PSKH1	Upregulated
hsa-miR-7-5p	COMMD1	Upregulated
hsa-miR-7-5p	NAA25	Upregulated
hsa-miR-7-5p	CHP1	Upregulated
hsa-miR-7-5p	TPGS2	Upregulated
hsa-miR-7-5p	SOGA3	Upregulated
hsa-miR-7-5p	KIAA1211	Upregulated
hsa-miR-877-5p	MAPK4	Upregulated
hsa-miR-877-5p	AGAP3	Upregulated
hsa-miR-877-5p	PEX19	Upregulated
hsa-miR-877-5p	LDLRAD3	Upregulated
hsa-miR-877-5p	SELENON	Upregulated
hsa-miR-877-5p	TTYH3	Upregulated
hsa-miR-877-5p	IL6ST	Upregulated
hsa-miR-877-5p	ATP2B2	Upregulated
hsa-miR-877-5p	FNDC5	Upregulated
hsa-miR-877-5p	KPNA6	Upregulated
hsa-miR-877-5p	TP53INP2	Upregulated
hsa-miR-877-5p	ZFYVE1	Upregulated
hsa-miR-877-5p	WISP1	Upregulated
hsa-miR-877-5p	PTPRT	Upregulated
hsa-miR-877-5p	HIVEP3	Upregulated
hsa-miR-877-5p	MYLK4	Upregulated
hsa-miR-877-5p	NCR3LG1	Upregulated
hsa-miR-877-5p	HAUS6	Upregulated
hsa-miR-877-5p	METRN	Upregulated
hsa-miR-877-5p	CLEC16A	Upregulated
hsa-miR-877-5p	ATP7B	Upregulated
hsa-miR-877-5p	LMX1B	Upregulated
hsa-miR-877-5p	UNC5B	Upregulated
hsa-miR-877-5p	SHROOM4	Upregulated
hsa-miR-877-5p	NIPA1	Upregulated
hsa-miR-877-5p	APPBP2	Upregulated
hsa-miR-877-5p	LPCAT2	Upregulated
hsa-miR-877-5p	ROBO4	Upregulated
hsa-miR-877-5p	LIPG	Upregulated
hsa-miR-877-5p	DGKH	Upregulated
hsa-miR-877-5p	UNC13C	Upregulated
hsa-miR-877-5p	NCDN	Upregulated
hsa-miR-877-5p	RFTN2	Upregulated
hsa-miR-877-5p	SPRN	Upregulated
hsa-miR-877-5p	ENAH	Upregulated
hsa-miR-877-5p	HGS	Upregulated
hsa-miR-877-5p	SZT2	Upregulated
hsa-miR-877-5p	PCDH12	Upregulated
hsa-miR-877-5p	LRRC6	Upregulated
hsa-miR-877-5p	TMEM144	Upregulated
hsa-miR-877-5p	SBNO1	Upregulated
hsa-miR-877-5p	PSMF1	Upregulated
hsa-miR-877-5p	ST8SIA3	Upregulated
hsa-miR-877-5p	FAM134C	Upregulated
hsa-miR-877-5p	TDG	Upregulated
hsa-miR-877-5p	MON1B	Upregulated
hsa-miR-877-5p	PIP5K1A	Upregulated
hsa-miR-877-5p	NXPH3	Upregulated
hsa-miR-877-5p	TPGS2	Upregulated
hsa-miR-877-5p	SDC3	Upregulated
hsa-miR-877-5p	TAOK1	Upregulated
hsa-miR-877-5p	IL1RAP	Upregulated
hsa-miR-877-5p	PTCH1	Upregulated
hsa-miR-877-5p	CNNM4	Upregulated
hsa-miR-92a-3p	SSBP2	Upregulated
hsa-miR-92a-3p	NSMAF	Upregulated
hsa-miR-92a-3p	PTPRT	Upregulated
hsa-miR-92a-3p	ATXN3	Upregulated
hsa-miR-92a-3p	KIAA1211	Upregulated
hsa-miR-92a-3p	IL1RL1	Upregulated
hsa-miR-92a-3p	ABCG4	Upregulated
hsa-miR-92a-3p	AIDA	Upregulated
hsa-miR-92a-3p	GAA	Upregulated
hsa-miR-92a-3p	LMX1B	Upregulated
hsa-miR-92a-3p	SNRPD3	Upregulated
hsa-miR-92a-3p	SIRPA	Upregulated
hsa-miR-92a-3p	TMOD2	Upregulated
hsa-miR-92a-3p	TAF1	Upregulated
hsa-miR-92a-3p	CLOCK	Upregulated
hsa-miR-92a-3p	ZC3H6	Upregulated
hsa-miR-92a-3p	PPP1R37	Upregulated
hsa-miR-92a-3p	TRAK2	Upregulated
hsa-miR-92a-3p	NFIB	Upregulated
hsa-miR-92a-3p	ARHGEF17	Upregulated
hsa-miR-92a-3p	CPT1A	Upregulated
hsa-miR-92a-3p	EIF5A2	Upregulated
hsa-miR-92a-3p	EEF2K	Upregulated
hsa-miR-92b-3p	ELMSAN1	Upregulated
hsa-miR-92b-3p	TRAK2	Upregulated
hsa-miR-92b-3p	CADM2	Upregulated
hsa-miR-92b-3p	NEO1	Upregulated
hsa-miR-92b-3p	LMX1B	Upregulated
hsa-miR-92b-3p	PSMF1	Upregulated
hsa-miR-92b-3p	USP31	Upregulated
hsa-miR-92b-3p	NSMAF	Upregulated
hsa-miR-92b-3p	TNFRSF10B	Upregulated
hsa-miR-92b-3p	LRRC27	Upregulated
hsa-miR-92b-3p	PTPRT	Upregulated
hsa-miR-935	HSPH1	Upregulated
hsa-miR-935	IP6K1	Upregulated
hsa-miR-935	CEP68	Upregulated
hsa-miR-935	DPH5	Upregulated
hsa-miR-935	RPL28	Upregulated
hsa-miR-935	PDE10A	Upregulated
hsa-miR-935	RND1	Upregulated
hsa-miR-935	UFC1	Upregulated
hsa-miR-935	SLU7	Upregulated
hsa-miR-98-5p	CADM2	Upregulated
hsa-miR-98-5p	CCDC93	Upregulated
hsa-miR-98-5p	DNAL1	Upregulated
hsa-miR-98-5p	ANGPT4	Upregulated
hsa-miR-98-5p	TSEN34	Upregulated
hsa-miR-98-5p	NRG1	Upregulated
hsa-miR-98-5p	SERPINB9	Upregulated
hsa-miR-98-5p	IDS	Upregulated
hsa-miR-98-5p	USP31	Upregulated
hsa-miR-98-5p	ENOSF1	Upregulated
hsa-miR-98-5p	ZCCHC3	Upregulated
hsa-miR-98-5p	FBXW2	Upregulated
hsa-miR-10396a-3p	SNRPD3	Downregulated
hsa-miR-10396a-3p	ATP7B	Downregulated
hsa-miR-10396a-3p	CLPTM1	Downregulated
hsa-miR-10396a-3p	PACS2	Downregulated
hsa-miR-10396a-3p	CLOCK	Downregulated
hsa-miR-10396a-3p	MYO9B	Downregulated
hsa-miR-10396a-3p	SMOC2	Downregulated
hsa-miR-10396a-3p	METRN	Downregulated
hsa-miR-10396a-3p	C1QTNF1	Downregulated
hsa-miR-10396a-3p	EMCN	Downregulated
hsa-miR-10396a-3p	FRMD8	Downregulated
hsa-miR-10396a-3p	NRBP1	Downregulated
hsa-miR-10396a-3p	RAB11B	Downregulated
hsa-miR-10396a-3p	TINAGL1	Downregulated
hsa-miR-10396a-3p	AP1B1	Downregulated
hsa-miR-10396a-3p	NXPH3	Downregulated
hsa-miR-10396a-3p	TAOK1	Downregulated
hsa-miR-10396a-3p	KCNAB2	Downregulated
hsa-miR-10396a-3p	CAPN15	Downregulated
hsa-miR-10396a-3p	C11orf95	Downregulated
hsa-miR-10396a-3p	TRIOBP	Downregulated
hsa-miR-10396a-3p	TRAF7	Downregulated
hsa-miR-10396a-3p	TTYH3	Downregulated
hsa-miR-10396a-3p	USF2	Downregulated
hsa-miR-10396a-3p	STK16	Downregulated
hsa-miR-10396a-3p	ABCG4	Downregulated
hsa-miR-10396a-3p	ADAMTS4	Downregulated
hsa-miR-10396a-3p	TCF3	Downregulated
hsa-miR-10396a-3p	ZDHHC14	Downregulated
hsa-miR-10396a-3p	RIMS4	Downregulated
hsa-miR-10396a-3p	ZBTB7A	Downregulated
hsa-miR-10396a-3p	TEN1	Downregulated
hsa-miR-10396a-3p	ATXN7L3	Downregulated
hsa-miR-10396a-3p	SDC3	Downregulated
hsa-miR-10396a-3p	SELENON	Downregulated
hsa-miR-10396a-3p	SLIT1	Downregulated
hsa-miR-10396a-3p	MNT	Downregulated
hsa-miR-10396a-3p	PDLIM4	Downregulated
hsa-miR-10396a-3p	NID1	Downregulated
hsa-miR-10396a-3p	SZT2	Downregulated
hsa-miR-10396a-3p	AKAP13	Downregulated
hsa-miR-10396a-3p	SBF1	Downregulated
hsa-miR-10396a-3p	MICAL3	Downregulated
hsa-miR-10396a-3p	CLEC16A	Downregulated
hsa-miR-10396a-3p	CENPB	Downregulated
hsa-miR-10396a-3p	SBNO2	Downregulated
hsa-miR-10396a-3p	BTNL9	Downregulated
hsa-miR-10396a-5p	ZFAND3	Downregulated
hsa-miR-10396a-5p	RASA3	Downregulated
hsa-miR-10396a-5p	PHC2	Downregulated
hsa-miR-10396a-5p	IP6K1	Downregulated
hsa-miR-10396a-5p	CLEC16A	Downregulated
hsa-miR-10396a-5p	MON1B	Downregulated
hsa-miR-10396a-5p	JUNB	Downregulated
hsa-miR-10396a-5p	URM1	Downregulated
hsa-miR-10396a-5p	STK11	Downregulated
hsa-miR-10396a-5p	CSNK1E	Downregulated
hsa-miR-10396a-5p	HARS	Downregulated
hsa-miR-10396a-5p	CDC42BPB	Downregulated
hsa-miR-10396a-5p	FRMD8	Downregulated
hsa-miR-10396a-5p	UNC93B1	Downregulated
hsa-miR-10396a-5p	SPRN	Downregulated
hsa-miR-10396a-5p	IL32	Downregulated
hsa-miR-10396a-5p	LDLRAD3	Downregulated
hsa-miR-10396a-5p	UNC5B	Downregulated
hsa-miR-10396a-5p	ELMSAN1	Downregulated
hsa-miR-10396a-5p	TINAGL1	Downregulated
hsa-miR-10396a-5p	SAMD4A	Downregulated
hsa-miR-10396a-5p	LOC400927-CSNK1E	Downregulated
hsa-miR-10396a-5p	UBTD1	Downregulated
hsa-miR-10396a-5p	TMOD2	Downregulated
hsa-miR-10396a-5p	GNB1	Downregulated
hsa-miR-10396a-5p	CAPN15	Downregulated
hsa-miR-10396a-5p	CSMD2	Downregulated
hsa-miR-10396a-5p	CX3CL1	Downregulated
hsa-miR-10396a-5p	RAPGEF1	Downregulated
hsa-miR-10396a-5p	PANK2	Downregulated
hsa-miR-10396a-5p	ZBTB7A	Downregulated
hsa-miR-10396a-5p	ZC3H18	Downregulated
hsa-miR-10396a-5p	SBF1	Downregulated
hsa-miR-10396a-5p	KIAA1462	Downregulated
hsa-miR-10396a-5p	PYCR2	Downregulated
hsa-miR-10396a-5p	AP1B1	Downregulated
hsa-miR-10396a-5p	MNT	Downregulated
hsa-miR-10396a-5p	PHLDA1	Downregulated
hsa-miR-10396a-5p	MAU2	Downregulated
hsa-miR-10396a-5p	SBNO2	Downregulated
hsa-miR-10396a-5p	PITPNB	Downregulated
hsa-miR-10396a-5p	LRP3	Downregulated
hsa-miR-10396a-5p	SZT2	Downregulated
hsa-miR-10396a-5p	NXPH3	Downregulated
hsa-miR-10396a-5p	NBEAL2	Downregulated
hsa-miR-10396a-5p	TCF3	Downregulated
hsa-miR-10396a-5p	JRK	Downregulated
hsa-miR-10396a-5p	RCN3	Downregulated
hsa-miR-10396a-5p	TTYH3	Downregulated
hsa-miR-10396b-3p	SBF1	Downregulated
hsa-miR-10396b-3p	ATP7B	Downregulated
hsa-miR-10396b-3p	C11orf95	Downregulated
hsa-miR-10396b-3p	JAG2	Downregulated
hsa-miR-10396b-3p	ABCF2	Downregulated
hsa-miR-10396b-3p	TEN1	Downregulated
hsa-miR-10396b-3p	TRAF3	Downregulated
hsa-miR-10396b-3p	TULP1	Downregulated
hsa-miR-10396b-3p	C1QTNF1	Downregulated
hsa-miR-10396b-3p	AKAP13	Downregulated
hsa-miR-10396b-3p	ZDHHC14	Downregulated
hsa-miR-10396b-3p	NRBP1	Downregulated
hsa-miR-10396b-3p	NXPH3	Downregulated
hsa-miR-10396b-3p	SMOC2	Downregulated
hsa-miR-10396b-3p	RAB11B	Downregulated
hsa-miR-10396b-3p	MAU2	Downregulated
hsa-miR-10396b-3p	ZNF362	Downregulated
hsa-miR-10396b-3p	ABCG4	Downregulated
hsa-miR-10396b-3p	ZBTB7A	Downregulated
hsa-miR-10396b-3p	STK16	Downregulated
hsa-miR-10396b-3p	ADAMTS4	Downregulated
hsa-miR-10396b-3p	BTNL9	Downregulated
hsa-miR-10396b-3p	TTYH3	Downregulated
hsa-miR-10396b-3p	METRN	Downregulated
hsa-miR-10396b-3p	ATXN7L3	Downregulated
hsa-miR-10396b-3p	PACS2	Downregulated
hsa-miR-10396b-3p	TINAGL1	Downregulated
hsa-miR-10396b-3p	PHC2	Downregulated
hsa-miR-10396b-3p	FRMD8	Downregulated
hsa-miR-10396b-3p	MICAL3	Downregulated
hsa-miR-10396b-3p	TRAF7	Downregulated
hsa-miR-10396b-3p	EMCN	Downregulated
hsa-miR-10396b-3p	SNRPD3	Downregulated
hsa-miR-10396b-3p	CLOCK	Downregulated
hsa-miR-10396b-3p	SELENON	Downregulated
hsa-miR-10396b-3p	CLPTM1	Downregulated
hsa-miR-10396b-3p	CLEC16A	Downregulated
hsa-miR-10396b-3p	TAOK1	Downregulated
hsa-miR-10396b-3p	CENPB	Downregulated
hsa-miR-10396b-3p	NID1	Downregulated
hsa-miR-10396b-3p	SZT2	Downregulated
hsa-miR-10396b-3p	TCF3	Downregulated
hsa-miR-10396b-3p	MNT	Downregulated
hsa-miR-10396b-3p	EPS15L1	Downregulated
hsa-miR-10396b-3p	SBNO2	Downregulated
hsa-miR-10396b-3p	AP1B1	Downregulated
hsa-miR-10396b-3p	PDLIM4	Downregulated
hsa-miR-10396b-3p	MYO9B	Downregulated
hsa-miR-10396b-3p	CAPN15	Downregulated
hsa-miR-10396b-5p	SOX13	Downregulated
hsa-miR-10396b-5p	JRK	Downregulated
hsa-miR-10396b-5p	TCF3	Downregulated
hsa-miR-10396b-5p	DPY19L3	Downregulated
hsa-miR-10396b-5p	SPATS2L	Downregulated
hsa-miR-10396b-5p	RAB11B	Downregulated
hsa-miR-10396b-5p	SAMD4A	Downregulated
hsa-miR-10396b-5p	TINAGL1	Downregulated
hsa-miR-10396b-5p	ZFAND3	Downregulated
hsa-miR-10396b-5p	SCRIB	Downregulated
hsa-miR-10396b-5p	LMX1B	Downregulated
hsa-miR-10396b-5p	UNK	Downregulated
hsa-miR-10396b-5p	MYO9B	Downregulated
hsa-miR-10396b-5p	PACS2	Downregulated
hsa-miR-10396b-5p	CDC42BPB	Downregulated
hsa-miR-10396b-5p	RANBP3	Downregulated
hsa-miR-10396b-5p	CABLES1	Downregulated
hsa-miR-10396b-5p	PDLIM7	Downregulated
hsa-miR-10396b-5p	SPRN	Downregulated
hsa-miR-10396b-5p	USF2	Downregulated
hsa-miR-10396b-5p	LOC400927-CSNK1E	Downregulated
hsa-miR-10396b-5p	SSR3	Downregulated
hsa-miR-10396b-5p	SHROOM4	Downregulated
hsa-miR-10396b-5p	AKAP13	Downregulated
hsa-miR-10396b-5p	AP1B1	Downregulated
hsa-miR-10396b-5p	MAFF	Downregulated
hsa-miR-10396b-5p	UBE2K	Downregulated
hsa-miR-10396b-5p	POLM	Downregulated
hsa-miR-10396b-5p	TRPM5	Downregulated
hsa-miR-10396b-5p	BCL2L2-PABPN1	Downregulated
hsa-miR-10396b-5p	ZC3H18	Downregulated
hsa-miR-10396b-5p	PPP1R18	Downregulated
hsa-miR-10396b-5p	PLPPR2	Downregulated
hsa-miR-10396b-5p	MNT	Downregulated
hsa-miR-10396b-5p	TRAK2	Downregulated
hsa-miR-10396b-5p	ELMSAN1	Downregulated
hsa-miR-10396b-5p	IL4R	Downregulated
hsa-miR-10396b-5p	ZBTB7A	Downregulated
hsa-miR-10396b-5p	UBTD1	Downregulated
hsa-miR-10396b-5p	STK11	Downregulated
hsa-miR-10396b-5p	SBF1	Downregulated
hsa-miR-10396b-5p	RRP15	Downregulated
hsa-miR-10396b-5p	CSMD2	Downregulated
hsa-miR-10396b-5p	RYR2	Downregulated
hsa-miR-10396b-5p	GIGYF2	Downregulated
hsa-miR-10396b-5p	GAB2	Downregulated
hsa-miR-10396b-5p	GNB1	Downregulated
hsa-miR-10396b-5p	SNX8	Downregulated
hsa-miR-10396b-5p	PABPN1	Downregulated
hsa-miR-10396b-5p	RASA3	Downregulated
hsa-miR-10396b-5p	CNNM4	Downregulated
hsa-miR-10396b-5p	FKBP8	Downregulated
hsa-miR-10396b-5p	MAU2	Downregulated
hsa-miR-10396b-5p	ANKRD40	Downregulated
hsa-miR-10396b-5p	CSNK1E	Downregulated
hsa-miR-10396b-5p	IL32	Downregulated
hsa-miR-10396b-5p	TTYH3	Downregulated
hsa-miR-10396b-5p	SBNO2	Downregulated
hsa-miR-10396b-5p	AGAP3	Downregulated
hsa-miR-10396b-5p	MIDN	Downregulated
hsa-miR-10396b-5p	NBEAL2	Downregulated
hsa-miR-10396b-5p	RAPGEF1	Downregulated
hsa-miR-10396b-5p	CTXN1	Downregulated
hsa-miR-10396b-5p	ADGRA1	Downregulated
hsa-miR-10396b-5p	TM2D2	Downregulated
hsa-miR-10396b-5p	GPX4	Downregulated
hsa-miR-10396b-5p	NXPH3	Downregulated
hsa-miR-10396b-5p	CAPN15	Downregulated
hsa-miR-10396b-5p	PAK4	Downregulated
hsa-miR-10396b-5p	C11orf95	Downregulated
hsa-miR-10396b-5p	KDM1B	Downregulated
hsa-miR-10396b-5p	LYPD2	Downregulated
hsa-miR-10396b-5p	SZT2	Downregulated
hsa-miR-10396b-5p	PITPNB	Downregulated
hsa-miR-10396b-5p	CX3CL1	Downregulated
hsa-miR-10396b-5p	JUNB	Downregulated
hsa-miR-10396b-5p	HUWE1	Downregulated
hsa-miR-10400-5p	PTPRS	Downregulated
hsa-miR-10400-5p	HUWE1	Downregulated
hsa-miR-10400-5p	TRAF3	Downregulated
hsa-miR-10400-5p	ATXN7L3	Downregulated
hsa-miR-10400-5p	ELMSAN1	Downregulated
hsa-miR-10400-5p	MICAL3	Downregulated
hsa-miR-10400-5p	GAA	Downregulated
hsa-miR-10400-5p	ATN1	Downregulated
hsa-miR-10400-5p	SELENON	Downregulated
hsa-miR-10400-5p	CSMD2	Downregulated
hsa-miR-10400-5p	CLPTM1	Downregulated
hsa-miR-10400-5p	USF2	Downregulated
hsa-miR-10400-5p	IP6K1	Downregulated
hsa-miR-10400-5p	CSK	Downregulated
hsa-miR-10400-5p	HOXC13	Downregulated
hsa-miR-10400-5p	MAFF	Downregulated
hsa-miR-10400-5p	JUNB	Downregulated
hsa-miR-10400-5p	PLPPR2	Downregulated
hsa-miR-10400-5p	CTXN1	Downregulated
hsa-miR-10400-5p	RIMS4	Downregulated
hsa-miR-10400-5p	TRA2B	Downregulated
hsa-miR-10400-5p	NFYA	Downregulated
hsa-miR-10400-5p	UNK	Downregulated
hsa-miR-10400-5p	C1QTNF1	Downregulated
hsa-miR-10400-5p	OTUB1	Downregulated
hsa-miR-10400-5p	EGR3	Downregulated
hsa-miR-10400-5p	AGAP3	Downregulated
hsa-miR-10400-5p	KIAA0141	Downregulated
hsa-miR-10400-5p	ZFAND3	Downregulated
hsa-miR-10400-5p	ZC3H6	Downregulated
hsa-miR-10400-5p	UBE2O	Downregulated
hsa-miR-10400-5p	MIDN	Downregulated
hsa-miR-10400-5p	SPRN	Downregulated
hsa-miR-10400-5p	NISCH	Downregulated
hsa-miR-10400-5p	SRGAP2	Downregulated
hsa-miR-10400-5p	MYO9B	Downregulated
hsa-miR-10400-5p	STK11	Downregulated
hsa-miR-10400-5p	ACTN1	Downregulated
hsa-miR-10400-5p	FOSL1	Downregulated
hsa-miR-10400-5p	RAB11B	Downregulated
hsa-miR-10400-5p	METRN	Downregulated
hsa-miR-10400-5p	TTYH3	Downregulated
hsa-miR-10400-5p	THOP1	Downregulated
hsa-miR-122-5p	TTYH3	Downregulated
hsa-miR-122-5p	SZT2	Downregulated
hsa-miR-122-5p	CDC42BPB	Downregulated
hsa-miR-122-5p	KLHL5	Downregulated
hsa-miR-122-5p	IST1	Downregulated
hsa-miR-122-5p	UMPS	Downregulated
hsa-miR-122-5p	ELMSAN1	Downregulated
hsa-miR-122-5p	STMN2	Downregulated
hsa-miR-122-5p	MSN	Downregulated
hsa-miR-122-5p	NCDN	Downregulated
hsa-miR-122-5p	SRGAP2	Downregulated
hsa-miR-122-5p	NCOA7	Downregulated
hsa-miR-122-5p	TPM3	Downregulated
hsa-miR-122-5p	IL6ST	Downregulated
hsa-miR-122-5p	ST8SIA3	Downregulated
hsa-miR-122-5p	TAOK1	Downregulated
hsa-miR-122-5p	SLC9A1	Downregulated
hsa-miR-122-5p	RBMS3	Downregulated
hsa-miR-122-5p	PPP6C	Downregulated
hsa-miR-122-5p	SOX13	Downregulated
hsa-miR-122-5p	CEP57	Downregulated
hsa-miR-122-5p	HECW2	Downregulated
hsa-miR-122-5p	TMEM189-UBE2V1	Downregulated
hsa-miR-122-5p	AKT3	Downregulated
hsa-miR-122-5p	SHROOM4	Downregulated
hsa-miR-122-5p	FOSL1	Downregulated
hsa-miR-122-5p	ANGPT2	Downregulated
hsa-miR-122-5p	CSMD2	Downregulated
hsa-miR-122-5p	NID1	Downregulated
hsa-miR-122-5p	CX3CL1	Downregulated
hsa-miR-122-5p	NXPH3	Downregulated
hsa-miR-122-5p	PSMF1	Downregulated
hsa-miR-122-5p	EPS15L1	Downregulated
hsa-miR-122-5p	MTMR9	Downregulated
hsa-miR-122-5p	SLIT1	Downregulated
hsa-miR-1246	DOK6	Downregulated
hsa-miR-1246	ADAL	Downregulated
hsa-miR-1246	NFYA	Downregulated
hsa-miR-1246	SOGA3	Downregulated
hsa-miR-1246	ENAH	Downregulated
hsa-miR-1246	NCOA7	Downregulated
hsa-miR-1246	ZNF391	Downregulated
hsa-miR-1246	UNC5B	Downregulated
hsa-miR-1246	DPY19L3	Downregulated
hsa-miR-1246	CPEB2	Downregulated
hsa-miR-1246	KPNA6	Downregulated
hsa-miR-1246	CDS2	Downregulated
hsa-miR-1246	MTMR9	Downregulated
hsa-miR-1246	ATP2B2	Downregulated
hsa-miR-1246	APPBP2	Downregulated
hsa-miR-1246	TAOK1	Downregulated
hsa-miR-1246	KLHL14	Downregulated
hsa-miR-1268a	ME2	Downregulated
hsa-miR-1268a	ELMSAN1	Downregulated
hsa-miR-1268a	MADD	Downregulated
hsa-miR-1268a	ANGPT4	Downregulated
hsa-miR-1268a	SASH1	Downregulated
hsa-miR-1268a	SERPINB9	Downregulated
hsa-miR-1268a	ATG4B	Downregulated
hsa-miR-1268a	SLC35F2	Downregulated
hsa-miR-1268a	MOB1B	Downregulated
hsa-miR-1268a	CAPNS1	Downregulated
hsa-miR-1268a	USP9X	Downregulated
hsa-miR-1268a	AXL	Downregulated
hsa-miR-1268a	PECAM1	Downregulated
hsa-miR-1268a	PCDHB11	Downregulated
hsa-miR-1268a	SH3BP2	Downregulated
hsa-miR-1268a	ZNF580	Downregulated
hsa-miR-1268a	COG2	Downregulated
hsa-miR-1268a	CHP1	Downregulated
hsa-miR-1268a	DFFB	Downregulated
hsa-miR-1268a	COL5A1	Downregulated
hsa-miR-1268a	RELL1	Downregulated
hsa-miR-1268a	FBXW2	Downregulated
hsa-miR-1268a	PAK2	Downregulated
hsa-miR-1268a	RBFA	Downregulated
hsa-miR-1268a	LDLRAD2	Downregulated
hsa-miR-1268a	TPM3	Downregulated
hsa-miR-1268a	MRPL4	Downregulated
hsa-miR-1268a	MRI1	Downregulated
hsa-miR-1268a	SKA2	Downregulated
hsa-miR-1268a	MAPK1IP1L	Downregulated
hsa-miR-1268a	TNFRSF10B	Downregulated
hsa-miR-1268a	PLXNA1	Downregulated
hsa-miR-1268a	MYO9B	Downregulated
hsa-miR-1268a	EHD2	Downregulated
hsa-miR-1268a	CRIP2	Downregulated
hsa-miR-1268a	E2F2	Downregulated
hsa-miR-1268a	TIE1	Downregulated
hsa-miR-1290	AIDA	Downregulated
hsa-miR-1290	MSN	Downregulated
hsa-miR-1290	TMOD2	Downregulated
hsa-miR-1290	UNC5B	Downregulated
hsa-miR-1290	DOK6	Downregulated
hsa-miR-1290	TAF1	Downregulated
hsa-miR-1290	DESI2	Downregulated
hsa-miR-1290	ATP2B2	Downregulated
hsa-miR-1290	ADAL	Downregulated
hsa-miR-1290	NFYA	Downregulated
hsa-miR-1290	HIVEP3	Downregulated
hsa-miR-1290	KLHL5	Downregulated
hsa-miR-1290	AFAP1	Downregulated
hsa-miR-1290	EEF2K	Downregulated
hsa-miR-1290	HNRNPDL	Downregulated
hsa-miR-1290	RIPK2	Downregulated
hsa-miR-1307-5p	C11orf95	Downregulated
hsa-miR-1307-5p	GID8	Downregulated
hsa-miR-133a-3p	TNFRSF10B	Downregulated
hsa-miR-133a-3p	IL6ST	Downregulated
hsa-miR-133a-3p	SURF6	Downregulated
hsa-miR-133b	IL6ST	Downregulated
hsa-miR-133b	TNFRSF10B	Downregulated
hsa-miR-133b	SURF6	Downregulated
hsa-miR-134-5p	PDE10A	Downregulated
hsa-miR-134-5p	HIVEP3	Downregulated
hsa-miR-134-5p	PTPN3	Downregulated
hsa-miR-134-5p	AKAP13	Downregulated
hsa-miR-134-5p	C11orf58	Downregulated
hsa-miR-134-5p	ZNF287	Downregulated
hsa-miR-134-5p	SOGA3	Downregulated
hsa-miR-134-5p	NFYA	Downregulated
hsa-miR-134-5p	CACNB4	Downregulated
hsa-miR-134-5p	HFE	Downregulated
hsa-miR-134-5p	SLC5A1	Downregulated
hsa-miR-134-5p	INPP5B	Downregulated
hsa-miR-134-5p	TRAF3	Downregulated
hsa-miR-134-5p	CDC42SE2	Downregulated
hsa-miR-134-5p	KCNAB2	Downregulated
hsa-miR-134-5p	GAB2	Downregulated
hsa-miR-134-5p	ZFYVE1	Downregulated
hsa-miR-134-5p	RANBP3	Downregulated
hsa-miR-134-5p	APPBP2	Downregulated
hsa-miR-134-5p	CPEB2	Downregulated
hsa-miR-134-5p	VEPH1	Downregulated
hsa-miR-134-5p	MSN	Downregulated
hsa-miR-134-5p	ACSL1	Downregulated
hsa-miR-134-5p	SDC3	Downregulated
hsa-miR-134-5p	SELENON	Downregulated
hsa-miR-134-5p	DBNDD1	Downregulated
hsa-miR-134-5p	EIF5A2	Downregulated
hsa-miR-134-5p	CMPK1	Downregulated
hsa-miR-134-5p	SLC35B4	Downregulated
hsa-miR-134-5p	MYLK4	Downregulated
hsa-miR-134-5p	KIAA1549	Downregulated
hsa-miR-134-5p	KPNA5	Downregulated
hsa-miR-134-5p	ACACA	Downregulated
hsa-miR-134-5p	WISP1	Downregulated
hsa-miR-134-5p	PACS2	Downregulated
hsa-miR-134-5p	EDN1	Downregulated
hsa-miR-134-5p	MIEF1	Downregulated
hsa-miR-134-5p	FAM134C	Downregulated
hsa-miR-134-5p	TULP1	Downregulated
hsa-miR-134-5p	NIPA1	Downregulated
hsa-miR-134-5p	SPATS2L	Downregulated
hsa-miR-134-5p	USP9X	Downregulated
hsa-miR-134-5p	AFAP1	Downregulated
hsa-miR-134-5p	TESMIN	Downregulated
hsa-miR-134-5p	URM1	Downregulated
hsa-miR-134-5p	ZC3H6	Downregulated
hsa-miR-134-5p	ATP5F1	Downregulated
hsa-miR-134-5p	FYCO1	Downregulated
hsa-miR-134-5p	AFAP1L1	Downregulated
hsa-miR-134-5p	FOXN2	Downregulated
hsa-miR-134-5p	MAMDC2	Downregulated
hsa-miR-134-5p	RMND5A	Downregulated
hsa-miR-134-5p	SZT2	Downregulated
hsa-miR-134-5p	TAOK1	Downregulated
hsa-miR-134-5p	LRRC1	Downregulated
hsa-miR-134-5p	RBMS3	Downregulated
hsa-miR-134-5p	MBTD1	Downregulated
hsa-miR-134-5p	SOWAHC	Downregulated
hsa-miR-134-5p	CSNK1E	Downregulated
hsa-miR-134-5p	KIAA1549L	Downregulated
hsa-miR-134-5p	SPRN	Downregulated
hsa-miR-134-5p	ALDH3B2	Downregulated
hsa-miR-134-5p	CX3CL1	Downregulated
hsa-miR-134-5p	VMAC	Downregulated
hsa-miR-134-5p	ANKRD50	Downregulated
hsa-miR-134-5p	SELP	Downregulated
hsa-miR-134-5p	LOC400927-CSNK1E	Downregulated
hsa-miR-134-5p	HOXC13	Downregulated
hsa-miR-134-5p	GABBR1	Downregulated
hsa-miR-1-3p	PSMF1	Downregulated
hsa-miR-1-3p	MMRN1	Downregulated
hsa-miR-1-3p	CLTC	Downregulated
hsa-miR-1-3p	ATP1B1	Downregulated
hsa-miR-1-3p	MAB21L1	Downregulated
hsa-miR-1-3p	SHROOM4	Downregulated
hsa-miR-1-3p	UTRN	Downregulated
hsa-miR-1-3p	RPA1	Downregulated
hsa-miR-140-3p	ANGPT4	Downregulated
hsa-miR-140-3p	LMX1B	Downregulated
hsa-miR-140-3p	KPNA6	Downregulated
hsa-miR-140-3p	SBNO1	Downregulated
hsa-miR-140-3p	NFAM1	Downregulated
hsa-miR-140-3p	ARIH1	Downregulated
hsa-miR-140-3p	RHOBTB3	Downregulated
hsa-miR-140-3p	SLTM	Downregulated
hsa-miR-140-3p	TARDBP	Downregulated
hsa-miR-140-3p	SH3BP2	Downregulated
hsa-miR-140-3p	AKAP13	Downregulated
hsa-miR-140-3p	PHF13	Downregulated
hsa-miR-140-3p	PSMF1	Downregulated
hsa-miR-140-3p	USP9X	Downregulated
hsa-miR-140-3p	FKBP1A	Downregulated
hsa-miR-140-3p	USP31	Downregulated
hsa-miR-140-3p	COL5A1	Downregulated
hsa-miR-140-3p	ICE2	Downregulated
hsa-miR-140-3p	E2F2	Downregulated
hsa-miR-140-3p	MARCKS	Downregulated
hsa-miR-140-3p	GLIPR2	Downregulated
hsa-miR-140-3p	ACAP2	Downregulated
hsa-miR-142-5p	ATP1B1	Downregulated
hsa-miR-143-3p	CADM2	Downregulated
hsa-miR-143-3p	SASH1	Downregulated
hsa-miR-143-3p	PPIL2	Downregulated
hsa-miR-143-3p	PTPRT	Downregulated
hsa-miR-143-3p	PSMF1	Downregulated
hsa-miR-143-3p	AKAP13	Downregulated
hsa-miR-143-3p	LRRC27	Downregulated
hsa-miR-143-3p	ATP6V1A	Downregulated
hsa-miR-143-3p	CHP2	Downregulated
hsa-miR-143-3p	HEG1	Downregulated
hsa-miR-143-3p	DDC	Downregulated
hsa-miR-143-3p	ITGA5	Downregulated
hsa-miR-143-3p	NFAM1	Downregulated
hsa-miR-143-3p	DCTD	Downregulated
hsa-miR-143-3p	PAK2	Downregulated
hsa-miR-143-3p	PRRC1	Downregulated
hsa-miR-143-3p	TARDBP	Downregulated
hsa-miR-143-3p	MSL1	Downregulated
hsa-miR-143-3p	KPNA6	Downregulated
hsa-miR-143-3p	CSTB	Downregulated
hsa-miR-143-3p	ZBTB44	Downregulated
hsa-miR-148a-3p	ASPH	Downregulated
hsa-miR-148a-3p	MTMR9	Downregulated
hsa-miR-148a-3p	ANGPT2	Downregulated
hsa-miR-148a-3p	AFAP1L1	Downregulated
hsa-miR-148a-3p	NIPA1	Downregulated
hsa-miR-148a-3p	LIPG	Downregulated
hsa-miR-148a-3p	ZCCHC2	Downregulated
hsa-miR-148a-3p	ZBTB7A	Downregulated
hsa-miR-150-5p	CACNB4	Downregulated
hsa-miR-150-5p	GAA	Downregulated
hsa-miR-150-5p	SNX8	Downregulated
hsa-miR-150-5p	RBFOX1	Downregulated
hsa-miR-150-5p	MAP3K11	Downregulated
hsa-miR-150-5p	ZMYM4	Downregulated
hsa-miR-150-5p	SIN3A	Downregulated
hsa-miR-150-5p	NCAPG	Downregulated
hsa-miR-150-5p	SLC24A1	Downregulated
hsa-miR-150-5p	SHC1	Downregulated
hsa-miR-150-5p	TRIOBP	Downregulated
hsa-miR-150-5p	STK16	Downregulated
hsa-miR-150-5p	CEP68	Downregulated
hsa-miR-150-5p	AKT3	Downregulated
hsa-miR-150-5p	ADAL	Downregulated
hsa-miR-150-5p	SBNO1	Downregulated
hsa-miR-150-5p	SBF1	Downregulated
hsa-miR-150-5p	MBTD1	Downregulated
hsa-miR-150-5p	CLOCK	Downregulated
hsa-miR-150-5p	STK11	Downregulated
hsa-miR-150-5p	OXSR1	Downregulated
hsa-miR-150-5p	MNT	Downregulated
hsa-miR-150-5p	TSC22D3	Downregulated
hsa-miR-150-5p	RAN	Downregulated
hsa-miR-150-5p	SMIM10L1	Downregulated
hsa-miR-184	DESI2	Downregulated
hsa-miR-184	KIAA1211	Downregulated
hsa-miR-184	APLN	Downregulated
hsa-miR-184	HIVEP3	Downregulated
hsa-miR-184	ZBTB7A	Downregulated
hsa-miR-184	RIMS4	Downregulated
hsa-miR-184	SLC5A1	Downregulated
hsa-miR-184	SIRPA	Downregulated
hsa-miR-184	SLC35B4	Downregulated
hsa-miR-184	SERTAD1	Downregulated
hsa-miR-184	SOX13	Downregulated
hsa-miR-184	GNB1	Downregulated
hsa-miR-184	EGR3	Downregulated
hsa-miR-184	CTBP1	Downregulated
hsa-miR-184	MICAL3	Downregulated
hsa-miR-184	ABCF2	Downregulated
hsa-miR-184	SLC9A1	Downregulated
hsa-miR-184	SNX8	Downregulated
hsa-miR-184	TDRD1	Downregulated
hsa-miR-184	TPM3	Downregulated
hsa-miR-192-5p	RGS4	Downregulated
hsa-miR-192-5p	ARIH1	Downregulated
hsa-miR-194-5p	CCPG1	Downregulated
hsa-miR-194-5p	FAM208B	Downregulated
hsa-miR-194-5p	MTMR6	Downregulated
hsa-miR-194-5p	GAB1	Downregulated
hsa-miR-194-5p	RELL1	Downregulated
hsa-miR-194-5p	IL6ST	Downregulated
hsa-miR-194-5p	USP31	Downregulated
hsa-miR-194-5p	NEGR1	Downregulated
hsa-miR-203a-3p	TBC1D9B	Downregulated
hsa-miR-203a-3p	CLTC	Downregulated
[truncated: 2,093 more rows]
